# Supplementary material for: Optimization of 3-Cyano-7-cyclopropylamino-pyrazolo[1,5-a]pyrimidines toward the Development of an In Vivo Chemical Probe for CSNK2A
Source: PubMed Central journal article supplement — ACS Omega. 2023 Oct 10;8(42):39546–61. doi: 10.1021/acsomega.3c05377 (PMC10600890; doi:10.1021/acsomega.3c05377), 2023-10-10
Supplement: ao3c05377_si_001.pdf [file ao3c05377_si_001.pdf]

## SUPPORTING INFORMATION

### Optimization of 3-Cyano-7-cyclopropylamino-pyrazolo[1,5-a]pyrimidines Toward the Development of an In Vivo Chemical Probe for CSNK2A

Xuan Yang,<sup>a,b</sup> Han Wee Ong,<sup>a,b</sup> Rebekah J. Dickmader,<sup>b,c,d,e</sup> Jeffery L. Smith,<sup>a</sup> Jason W. Brown,<sup>f</sup> William Tao,<sup>f</sup> Edcon Chang,<sup>f</sup> Nathaniel J. Moorman,<sup>b,c,d</sup> Alison D. Axtman,<sup>a,b</sup> and Timothy M. Willson<sup>a,b,\*</sup>

<sup>a</sup> Structural Genomics Consortium, UNC Eshelman School of Pharmacy, University of North Carolina at Chapel Hill, Chapel Hill, NC 27599, United States

<sup>b</sup> Rapidly Emerging Antiviral Drug Development Initiative (READDI), Chapel Hill, NC 27599, United States

<sup>c</sup> Department of Microbiology & Immunology, University of North Carolina at Chapel Hill, Chapel Hill, NC 27599, United States

<sup>d</sup> Lineberger Comprehensive Cancer Center, University of North Carolina at Chapel Hill, Chapel Hill, NC 27599, United States

<sup>e</sup> Department of Chemistry, University of North Carolina at Chapel Hill, Chapel Hill, NC 27599, United States

<sup>f</sup> Takeda Development Center Americas, Inc., San Diego, CA 92121, United States

\* E-mail: tim.willson@unc.edu

#### Table of Contents

|     |                                                                                                      |
|-----|------------------------------------------------------------------------------------------------------|
| S2  | <b>Figure S1.</b> SMARTCyp analysis of SGC-CK2-1 ( <b>1a</b> )                                       |
| S3  | <b>Figure S2.</b> MS fragmentation analysis and structure assignment of <b>1i</b> metabolites M1–12. |
| S9  | <b>Figure S3.</b> 1-ABT inhibits the metabolism of <b>2h</b> in mouse hepatocytes                    |
| S10 | <b>Table S1.</b> Dose ranging study of EA tolerability in mice                                       |
| S11 | NMR and HPLC Spectra for <b>1h–i</b> , <b>2b–g</b> , <b>2i–n</b>                                     |

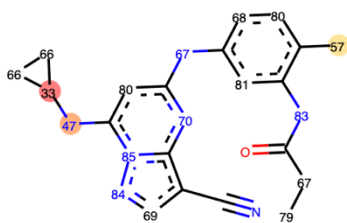

| 3A4 Ranking | Atom | 3A4 Score | Energy | 2DSASA | Span2end | Relative Span | Similarity |
|-------------|------|-----------|--------|--------|----------|---------------|------------|
| 1           | C.21 | 33.0      | 41.1   | 17.1   | 1        | 0.9           | 0.3        |
| 2           | N.20 | 46.8      | 54.1   | 13.5   | 2        | 0.8           | 0.3        |
| 3           | C.28 | 57.3      | 66.4   | 58.7   | 2        | 0.8           | 0.7        |
| 4           | C.22 | 65.9      | 75.9   | 50.1   | 0        | 1.0           | 0.3        |
| 5           | N.9  | 67.2      | 72.0   | 12.3   | 6        | 0.5           | 0.7        |
| 6           | C.3  | 67.3      | 75.9   | 30.6   | 1        | 0.9           | 0.7        |
| 7           | C.25 | 68.1      | 74.1   | 26.4   | 5        | 0.6           | 0.7        |
| 8           | C.16 | 69.4      | 78.1   | 33.4   | 1        | 0.9           | 0.3        |
| 9           | N.11 | 69.6      | 75.6   | 11.0   | 4        | 0.7           | 0.3        |
| 10          | C.4  | 79.0      | 89.6   | 64.4   | 0        | 1.0           | 0.7        |
| 11          | C.26 | 79.7      | 86.3   | 27.5   | 4        | 0.7           | 0.7        |
| 12          | C.24 | 80.0      | 86.3   | 18.6   | 4        | 0.7           | 0.3        |
| 13          | C.7  | 80.6      | 86.3   | 19.9   | 5        | 0.6           | 0.3        |
| 14          | N.5  | 83.0      | 89.6   | 10.8   | 3        | 0.8           | 0.3        |
| 15          | N.17 | 83.8      | 92.1   | 22.1   | 1        | 0.9           | 0.3        |
| 16          | N.18 | 85.2      | 92.1   | 3.3    | 2        | 0.8           | 0.3        |

**Figure S1.** SMARTCyp analysis of SGC-CK2-1 (**1a**). Output from the SMARTCyp server at [https://smartcyp.sund.ku.dk/mol\\_to\\_som](https://smartcyp.sund.ku.dk/mol_to_som). The predicted hotspots of cytochrome CYP3A4 metabolism are ranked for each heavy atom in the molecule. The top ranked atoms are located on the cyclopropylamine of the PZP and the 4'-methyl group of the aniline.

### M1

RT: 5.68 min;

$2H^{2+}$  Calculated  $m/z$  370.15828  
 $-COOH, -NH_3$  Calculated  $m/z$  338.64227,  $z=2$

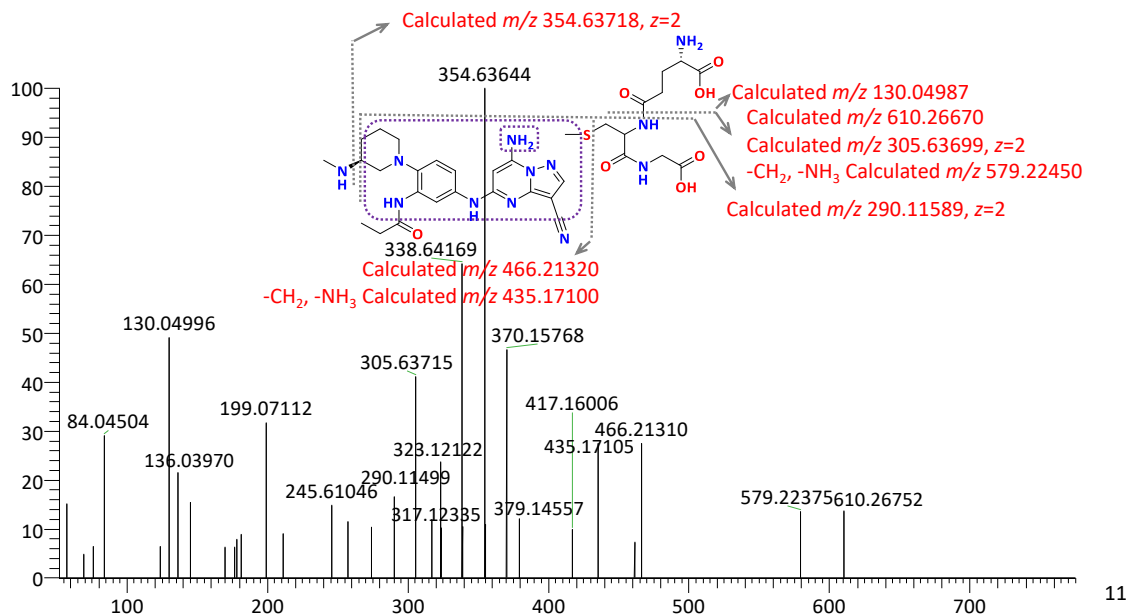

### M2

RT: 6.03 min;

$2H^{2+}$  Calculated  $m/z$  370.15828  
 $-COOH, -NH_3$  Calculated  $m/z$  338.64227,  $z=2$

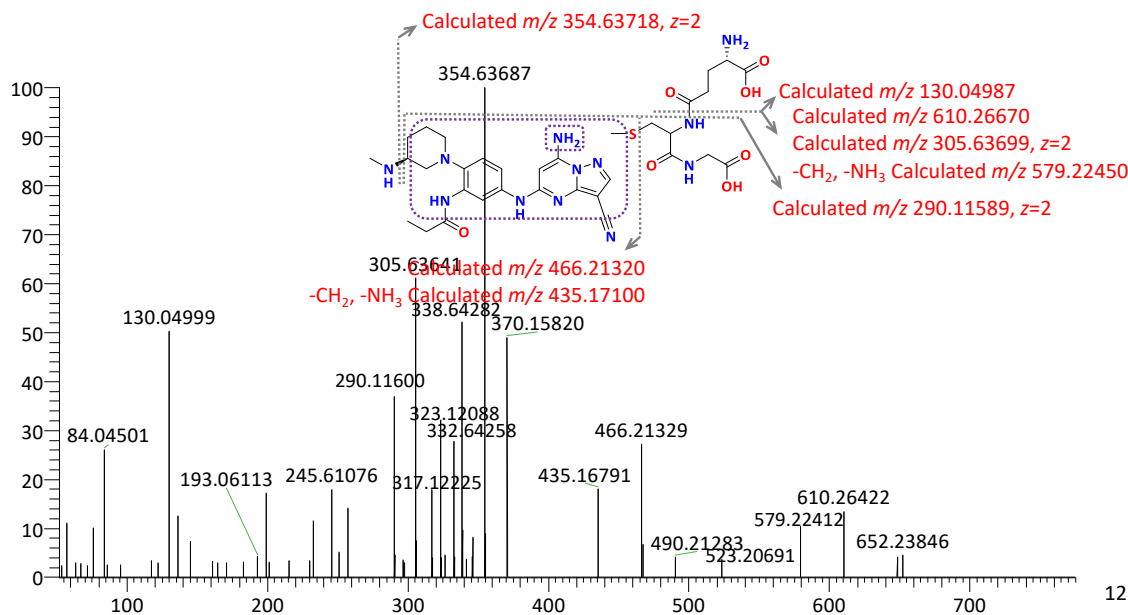

### M3

RT: 6.89 min;

$2H^{2+}$  Calculated  $m/z$  390.17393  
 -COOH, -NH<sub>3</sub> Calculated  $m/z$  358.65792,  $z=2$

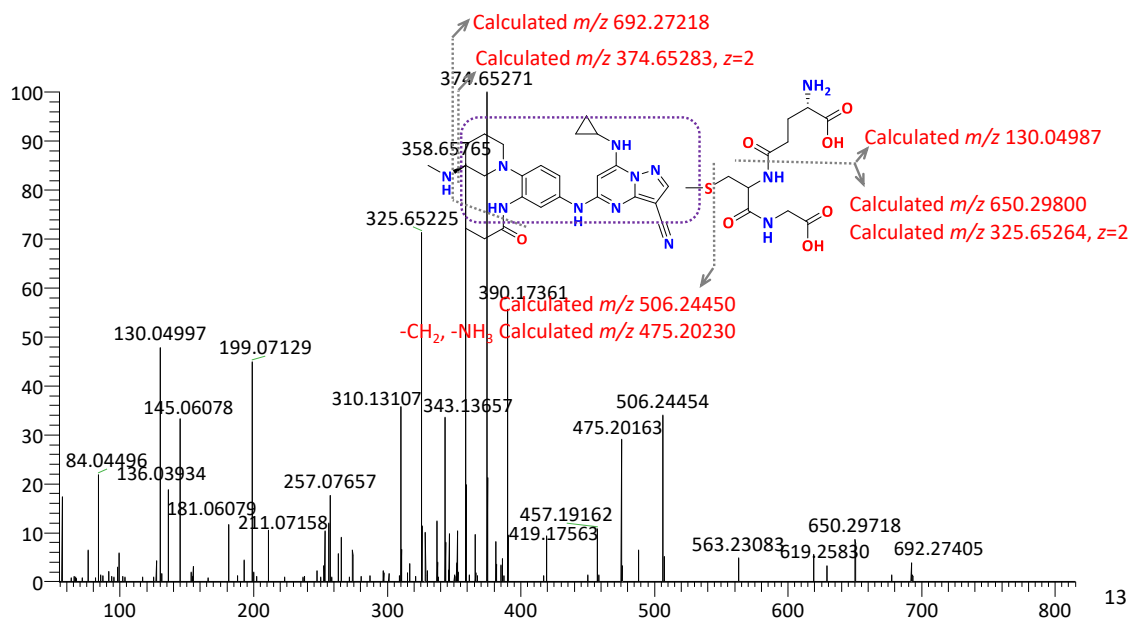

### M4

RT: 7.10 min;

$2H^{2+}$  Calculated  $m/z$  390.17393  
 -COOH, -NH<sub>3</sub> Calculated  $m/z$  358.65792,  $z=2$

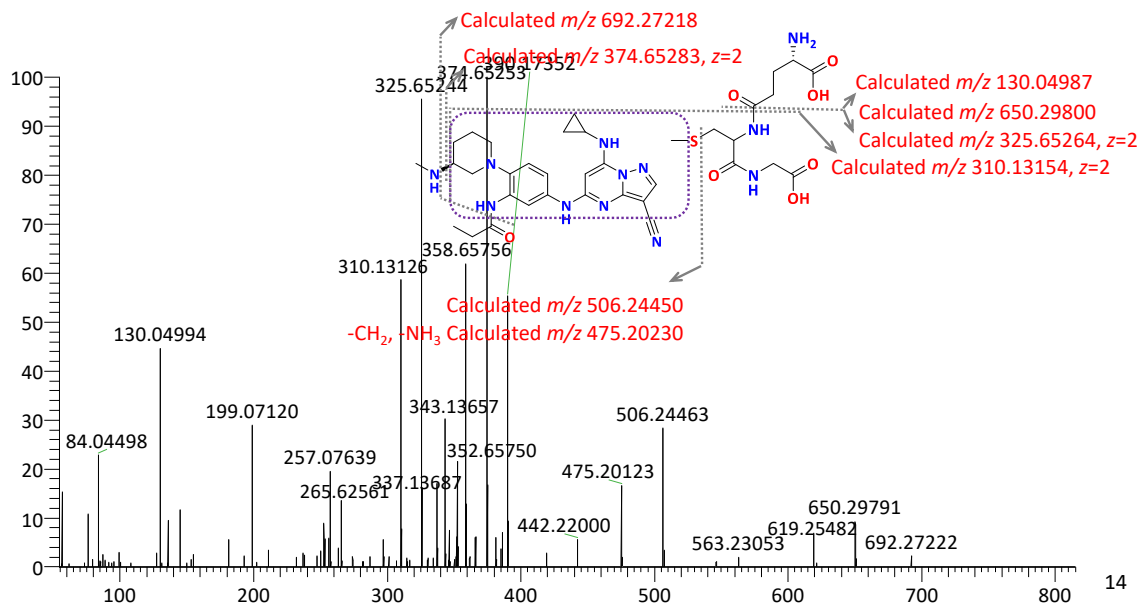

### M5

RT: 7.10 min;

$2H^{2+}$  Calculated  $m/z$  390.17393  
-COOH, -NH<sub>3</sub> Calculated  $m/z$  358.65792,  $z=2$

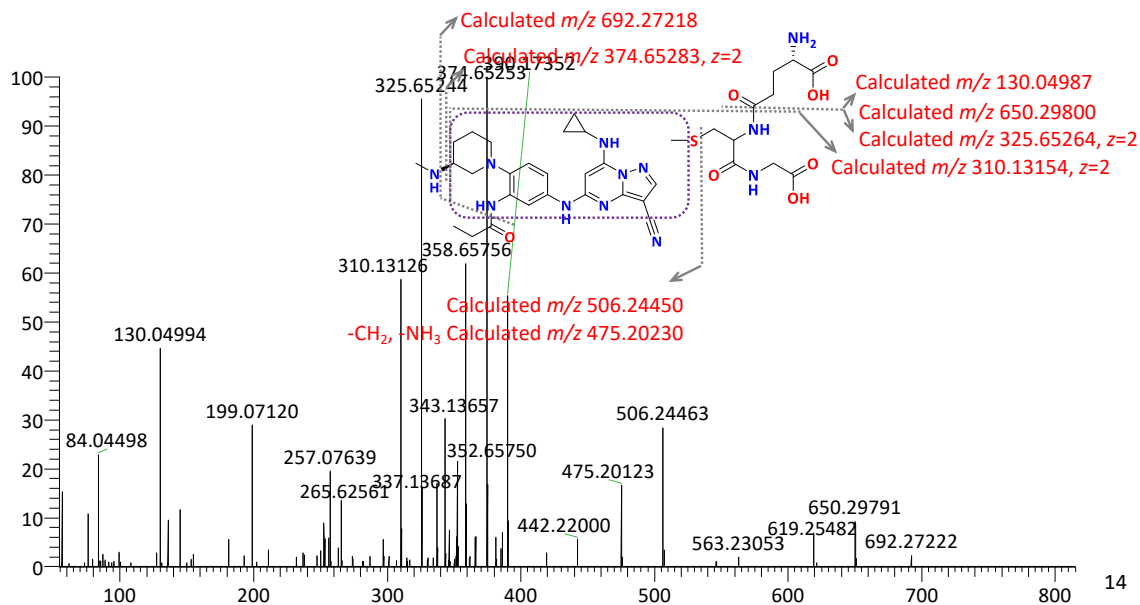

### M6

RT: 7.59 min;

$2H^{2+}$  Calculated  $m/z$  230.63203

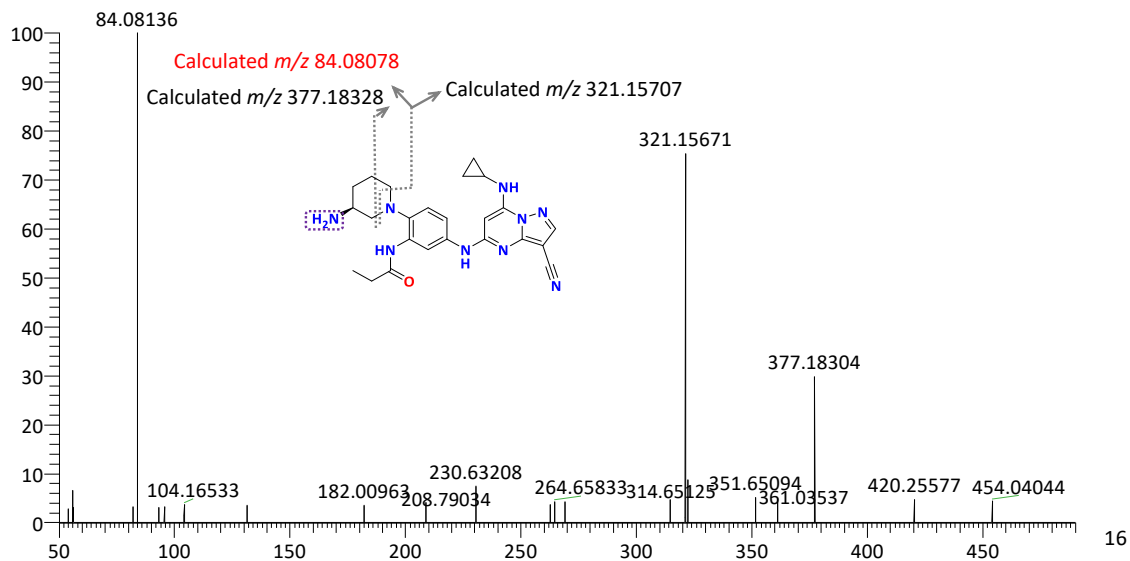

### M7

RT: 7.70 min;

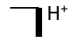

Calculated  $m/z$  472.25678

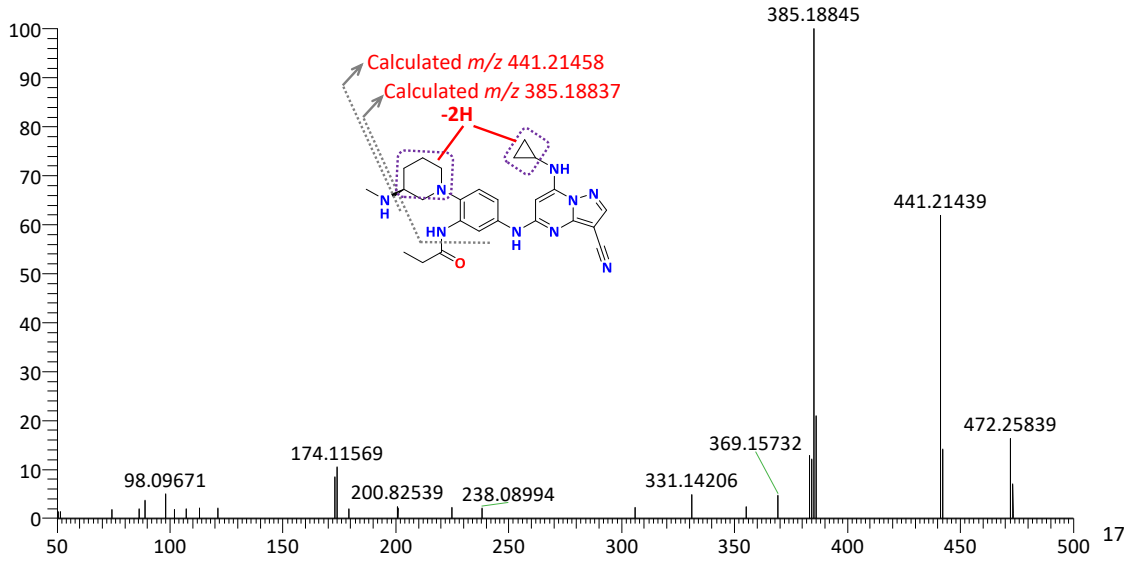

### M8

RT: 7.79 min;

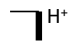

Calculated  $m/z$  418.24622

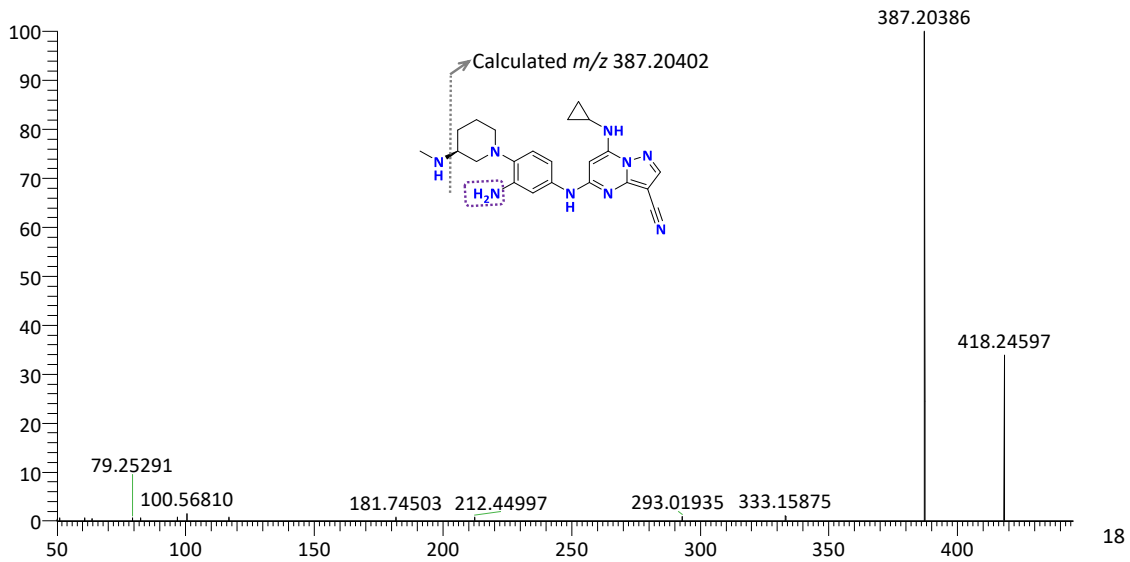

### M9

RT: 7.80 min;

$\text{H}^+$  Calculated  $m/z$  417.17820  
 $-\text{H}_2\text{O}$  Calculated  $m/z$  399.16763

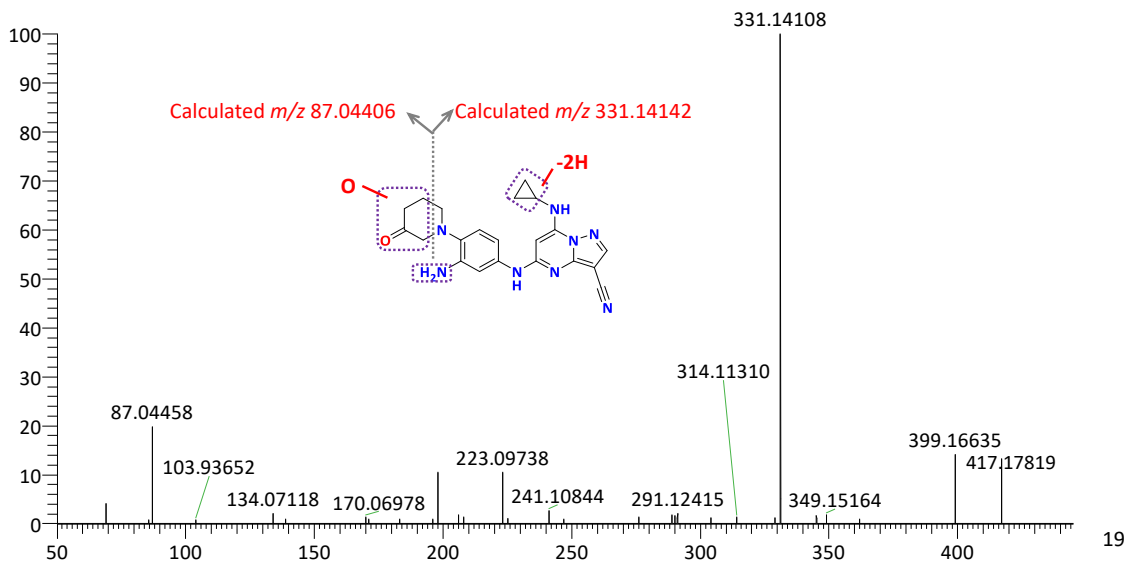

### M10

RT: 7.91 min;

$2\text{H}^{2+}$  Calculated  $m/z$  342.12137  
 $-\text{NH}_3$  Calculated  $m/z$  333.60809,  $z=2$

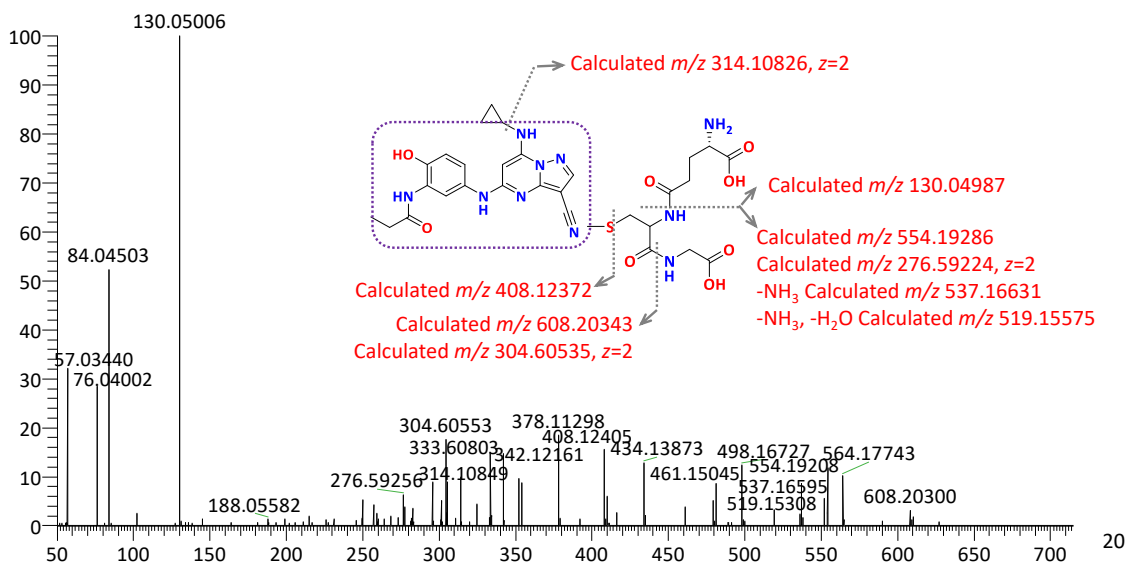

### M11

RT: 8.47 min;

$2\text{H}^{2+}$  Calculated  $m/z$  230.63203

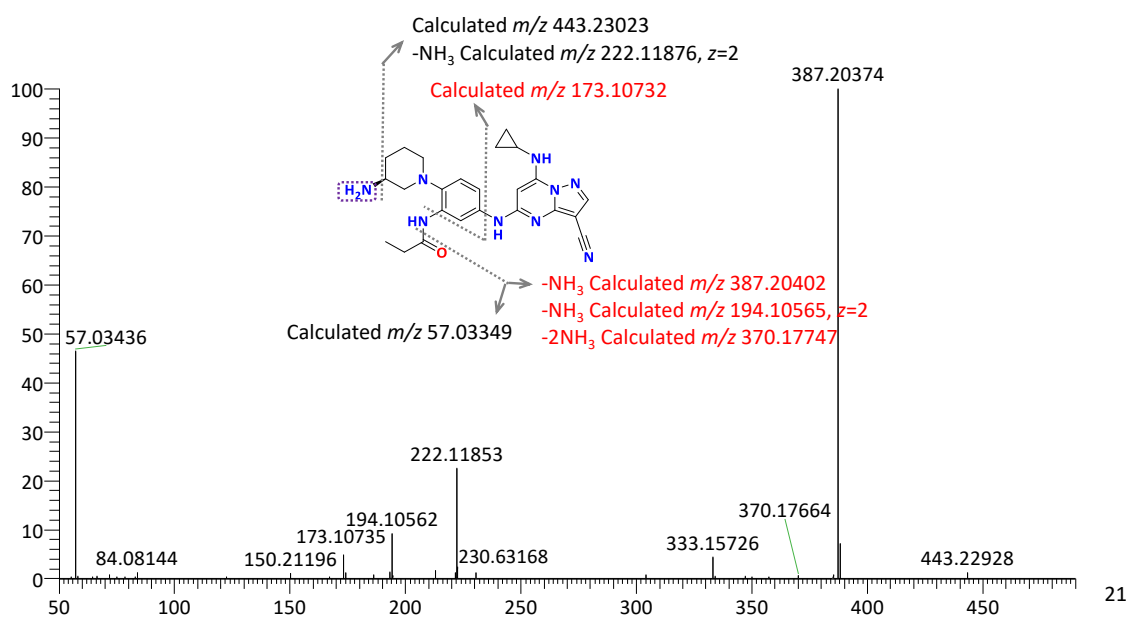

### M12

RT: 8.90 min;

$\text{H}^+$  Calculated  $m/z$  463.22006  
-H<sub>2</sub>O Calculated  $m/z$  445.20950

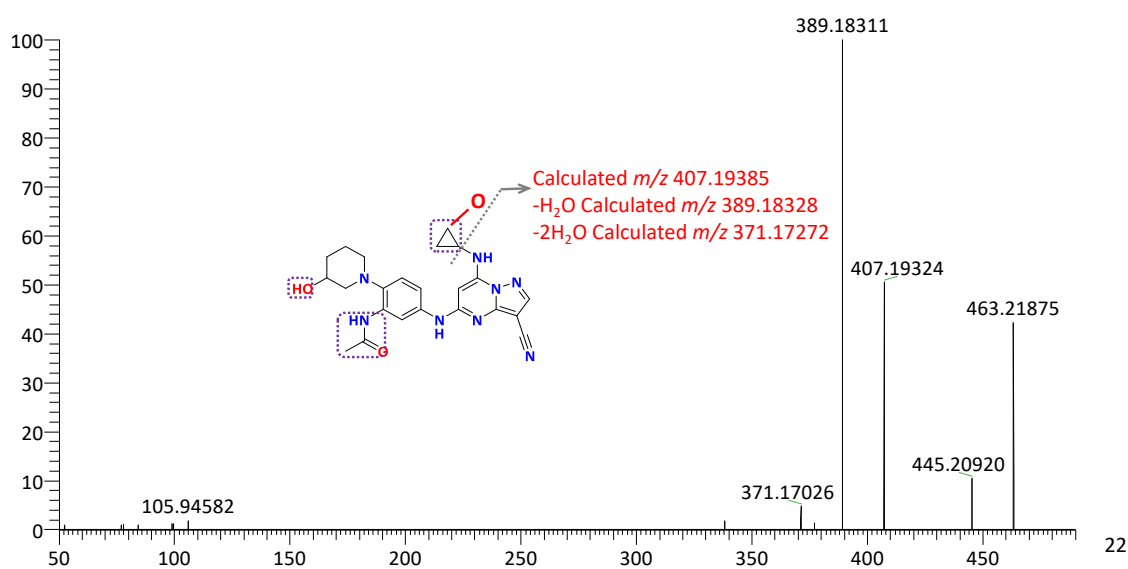

**Figure S2.** MS fragmentation analysis and structure assignment of **1i** metabolites **M1–M12**.



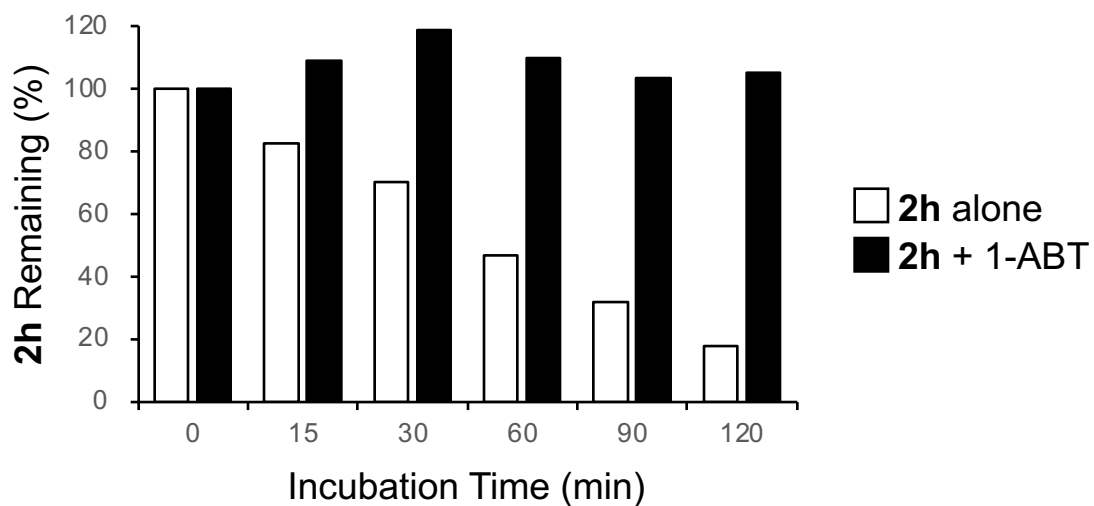

**Figure S3.** 1-ABT inhibits the metabolism of **2h** in mouse hepatocytes. **2h** (1  $\mu$ M) was incubated with mouse hepatocytes in the presence or absence of 1-ABT (1 mM). The percentage of **2h** remaining was measured by LC/MS/MS at 0.25, 0.5, 1.0, 1.5, and 2.0h.  $CL_{int}$  of **2h** was reduced from 330 to <32 mL/min/kg by 1-ABT.

**Table S1. Dose ranging study of EA tolerability in mice.**

| Dose (mg/kg) | Route | Volume (mL/kg) <sup>a</sup> | Formulation <sup>b</sup> | Adverse effects after 1 <sup>st</sup> dose <sup>c</sup> | Adverse effects after 2 <sup>nd</sup> dose <sup>c</sup> |
|--------------|-------|-----------------------------|--------------------------|---------------------------------------------------------|---------------------------------------------------------|
| 300          | i.p.  | 10                          | A                        | Tachycardia, hypothermia, death @ 15 min                | –                                                       |
| 100          | i.p.  | 10                          | A                        | Decreased activity, hypothermia, death @ 40 min         | –                                                       |
| 30           | i.p.  | 10                          | A                        | Decreased activity                                      | Decreased activity, death @ 60 min                      |
| 10           | i.p.  | 10                          | A                        | Decreased activity                                      | Decreased activity, hypothermia, death @ 70 min         |
| 3            | i.p.  | 10                          | A                        | Decreased activity                                      | Decreased activity, hypothermia                         |
| 10           | i.p.  | 1                           | B                        | None                                                    | Decreased activity, hypothermia <sup>d</sup>            |
| 10           | p.o.  | 1                           | B                        | None                                                    | Decreased activity, hypothermia <sup>d</sup>            |

Mice were dosed at 6h intervals with EA and observations made of clinical symptoms. A single mouse was used for each experiment. <sup>a</sup>Injection volume. <sup>b</sup>Formulation A: NMP, PEG400, Water (v/v/v, 10:60:30), Formulation B: DMSO, PEG300, Tween80, 20% HP- $\beta$ -CD in water (v/v/v/v, 10:40:5:45). <sup>c</sup>Clinical observations with time of death after dosing noted. <sup>d</sup>Symptoms resolved after 30 min. –, no second dose.

# NMR and HPLC spectra of 1h:

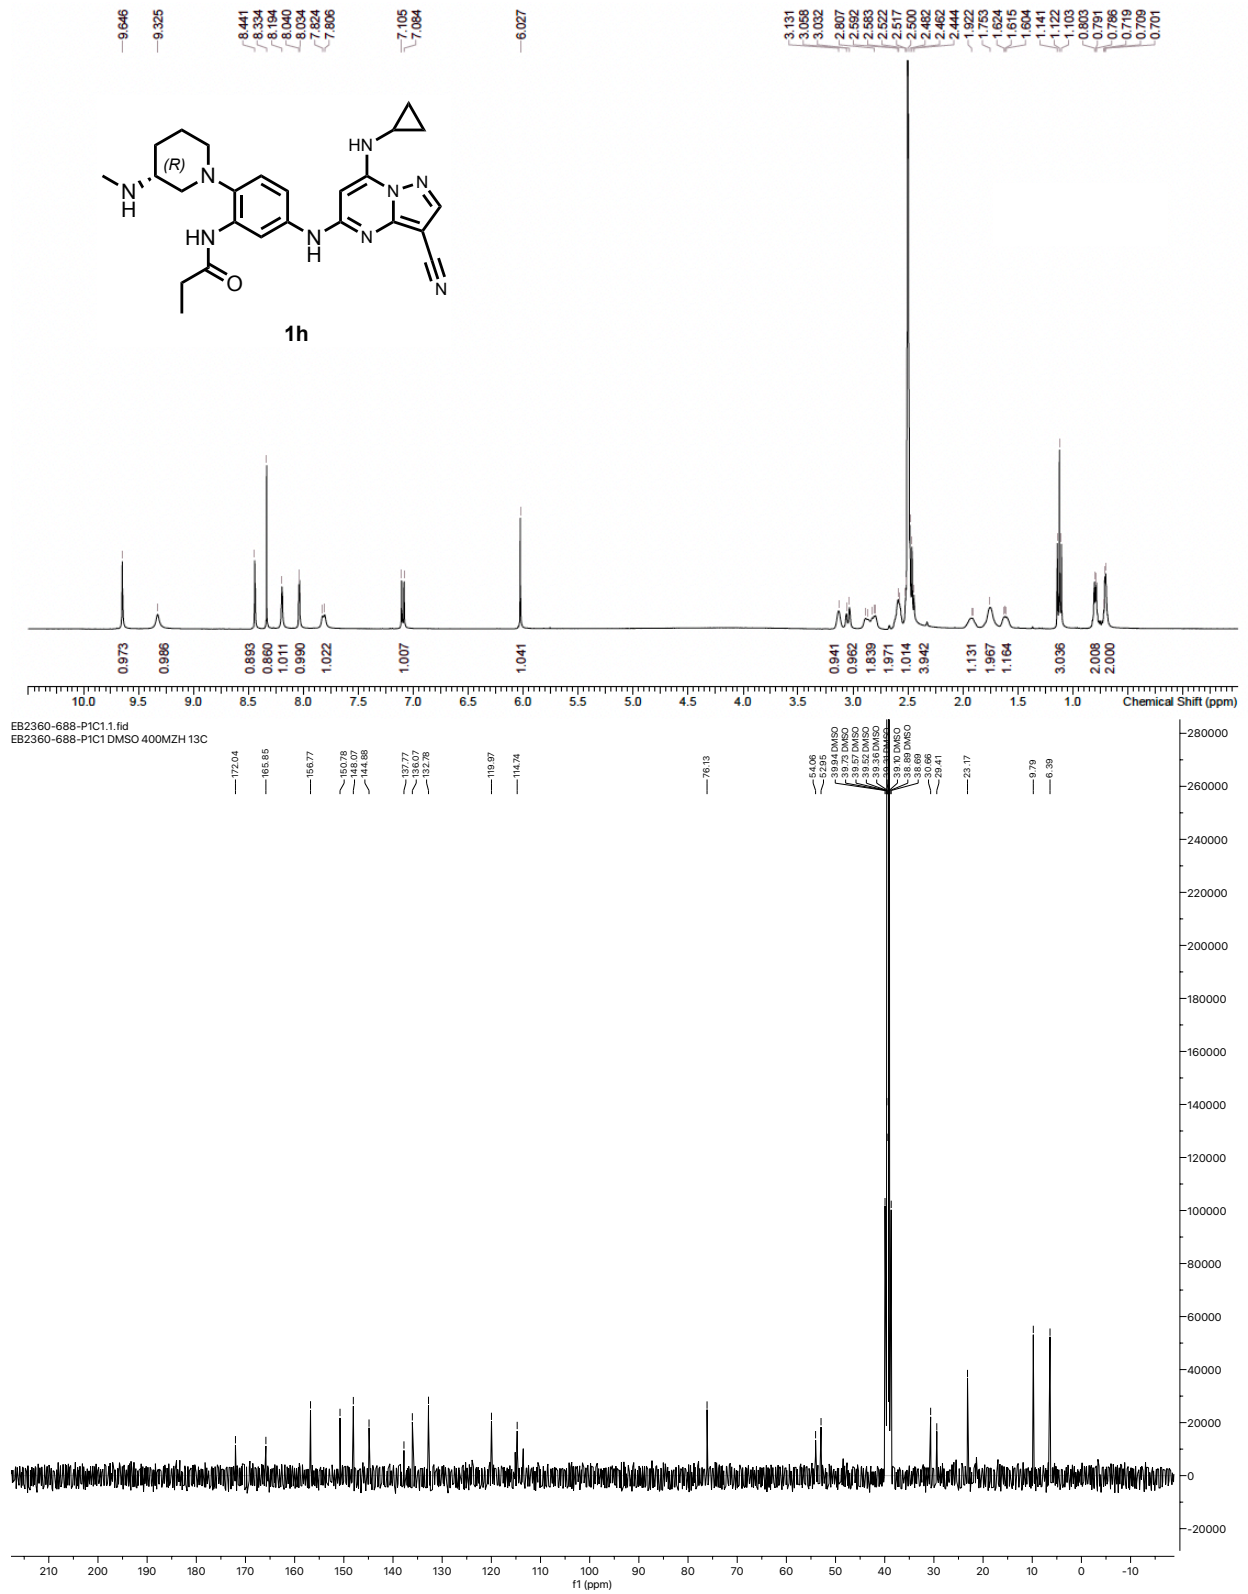

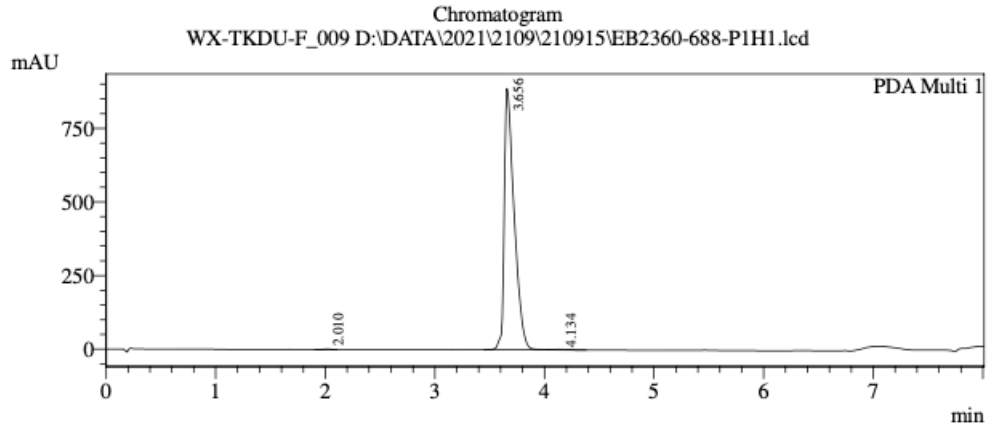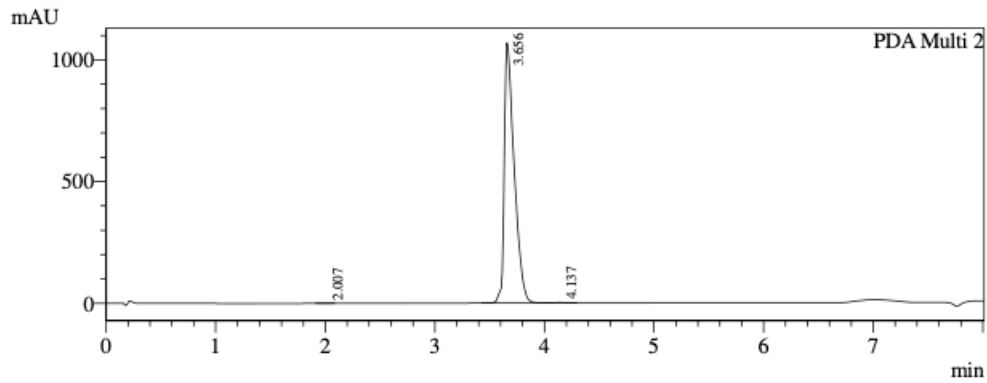

- 1 PDA Multi 1 / 220nm 4nm
- 2 PDA Multi 2 / 254nm 4nm

=====  
Integration Result  
=====

PeakTable

Ch1 220nm 4nm

| Peak# | Ret. Time | Height | Height % | Area    | Area %  |
|-------|-----------|--------|----------|---------|---------|
| 1     | 2.010     | 1586   | 0.178    | 8125    | 0.145   |
| 2     | 3.656     | 886751 | 99.581   | 5578720 | 99.572  |
| 3     | 4.134     | 2145   | 0.241    | 15832   | 0.283   |
| Total |           | 890482 | 100.000  | 5602677 | 100.000 |

PeakTable

Ch2 254nm 4nm

| Peak# | Ret. Time | Height  | Height % | Area    | Area %  |
|-------|-----------|---------|----------|---------|---------|
| 1     | 2.007     | 596     | 0.056    | 3088    | 0.046   |
| 2     | 3.656     | 1068344 | 99.725   | 6733801 | 99.686  |
| 3     | 4.137     | 2348    | 0.219    | 18112   | 0.268   |
| Total |           | 1071288 | 100.000  | 6755001 | 100.000 |

PeakTable

Ch3

# NMR and HPLC spectra of 1i:

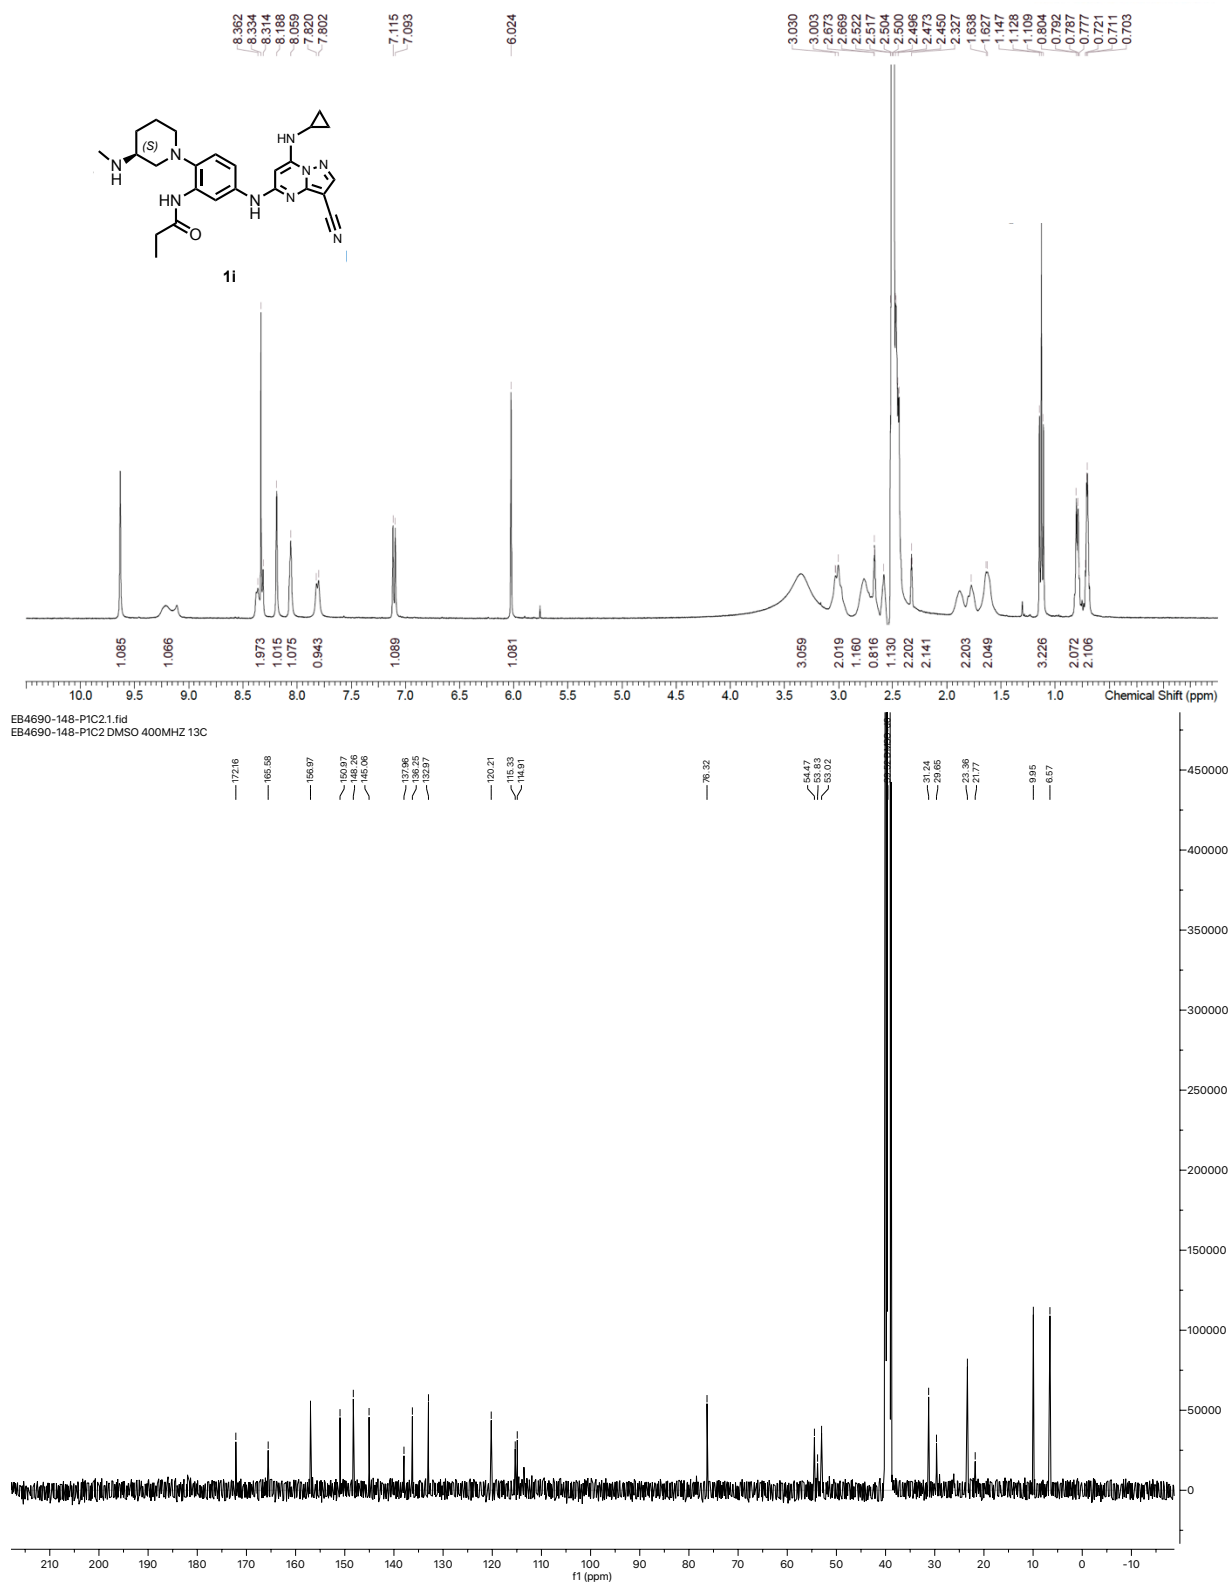

<Chromatogram>

Chromatogram  
WX-TKDU-F\_010 D:\DATA\2021\2109\210916\EB4690-148-P1H1.lcd

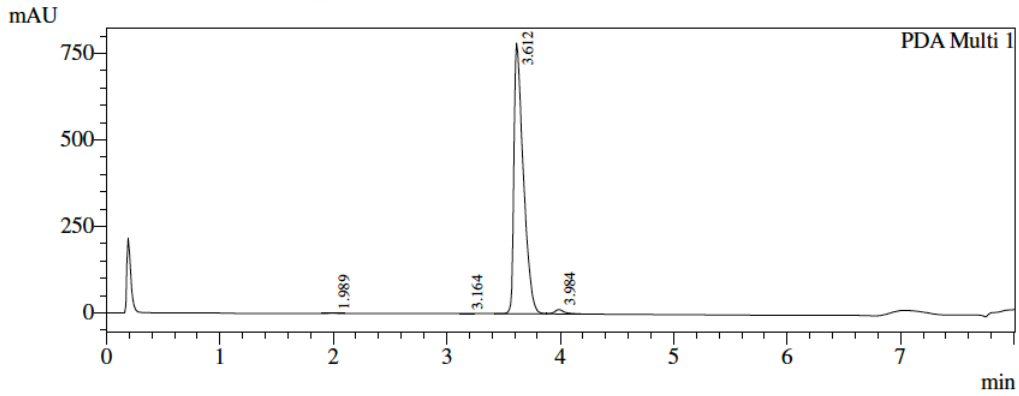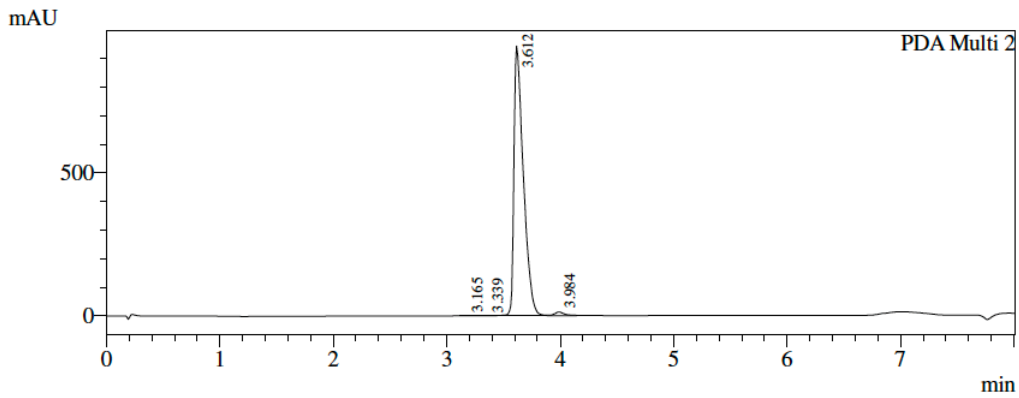

- 1 PDA Multi 1 / 220nm 4nm
- 2 PDA Multi 2 / 254nm 4nm

=====  
Integration Result  
=====

PeakTable

Ch1 220nm 4nm

| Peak# | Ret. Time | Height | Height % | Area    | Area %  |
|-------|-----------|--------|----------|---------|---------|
| 1     | 1.989     | 1411   | 0.177    | 5667    | 0.123   |
| 2     | 3.164     | 842    | 0.106    | 2792    | 0.061   |
| 3     | 3.612     | 781856 | 98.124   | 4505087 | 98.071  |
| 4     | 3.984     | 12697  | 1.593    | 80171   | 1.745   |
| Total |           | 796806 | 100.000  | 4593717 | 100.000 |

PeakTable

Ch2 254nm 4nm

| Peak# | Ret. Time | Height | Height % | Area    | Area %  |
|-------|-----------|--------|----------|---------|---------|
| 1     | 3.165     | 615    | 0.064    | 2024    | 0.037   |
| 2     | 3.339     | 524    | 0.055    | 4383    | 0.079   |
| 3     | 3.612     | 942218 | 98.585   | 5445281 | 98.407  |
| 4     | 3.984     | 12384  | 1.296    | 81740   | 1.477   |
| Total |           | 955740 | 100.000  | 5533428 | 100.000 |

PeakTable

Ch3

**NMR and HPLC spectra of 2a:**

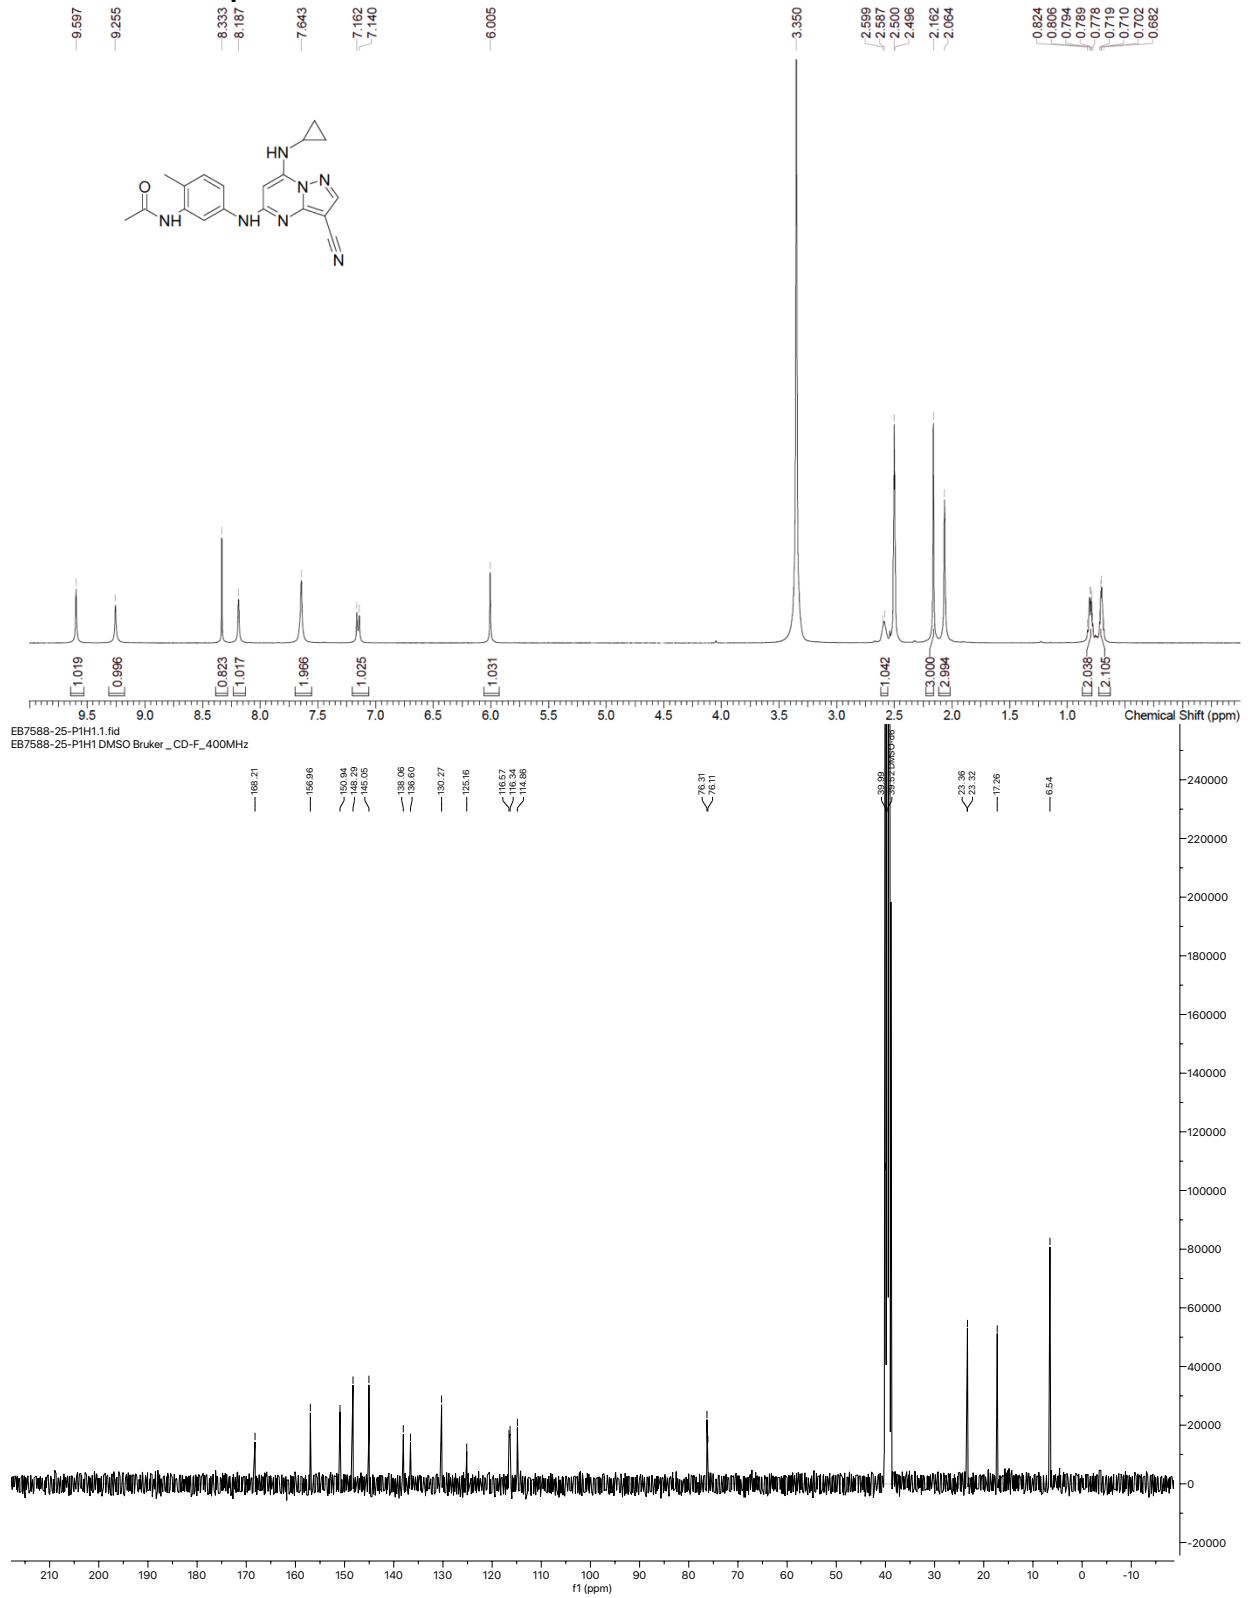

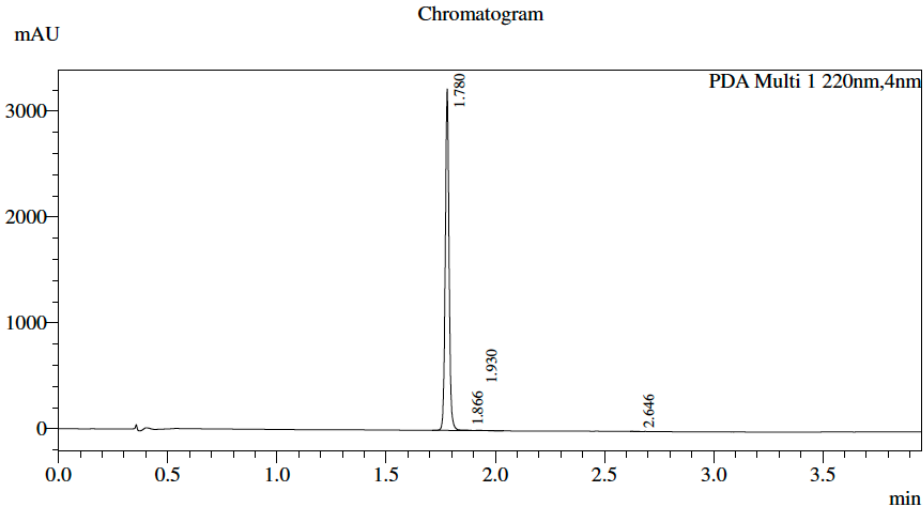

=====  
**Integration Result**  
 =====

PDA Ch1 220nm

| Peak# | Ret. Time | USP Width | Height  | Height% | Area    | Area%   |
|-------|-----------|-----------|---------|---------|---------|---------|
| 1     | 1.780     | 0.032     | 3226270 | 99.670  | 3879046 | 99.446  |
| 2     | 1.866     | 0.080     | 5152    | 0.159   | 9754    | 0.250   |
| 3     | 1.930     | 0.066     | 3910    | 0.121   | 9447    | 0.242   |
| 4     | 2.646     | 0.039     | 1610    | 0.050   | 2390    | 0.061   |
| Total |           |           | 3236942 | 100.000 | 3900637 | 100.000 |

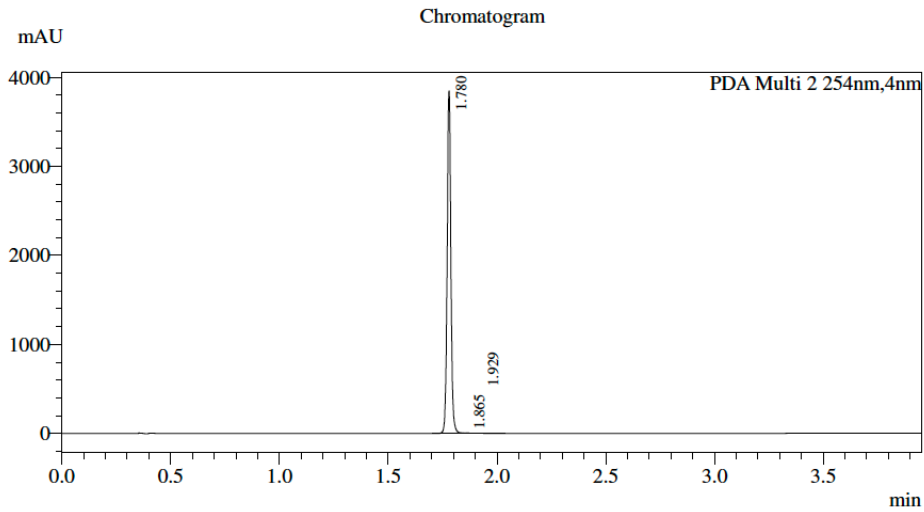

=====  
**Integration Result**  
 =====

PDA Ch2 254nm

| Peak# | Ret. Time | USP Width | Height  | Height% | Area    | Area%   |
|-------|-----------|-----------|---------|---------|---------|---------|
| 1     | 1.780     | 0.028     | 3846935 | 99.780  | 4569098 | 99.570  |
| 2     | 1.865     | 0.101     | 5193    | 0.135   | 10743   | 0.234   |
| 3     | 1.929     | 0.097     | 3295    | 0.085   | 8985    | 0.196   |
| Total |           |           | 3855422 | 100.000 | 4588826 | 100.000 |



# NMR and HPLC spectra of 2b:

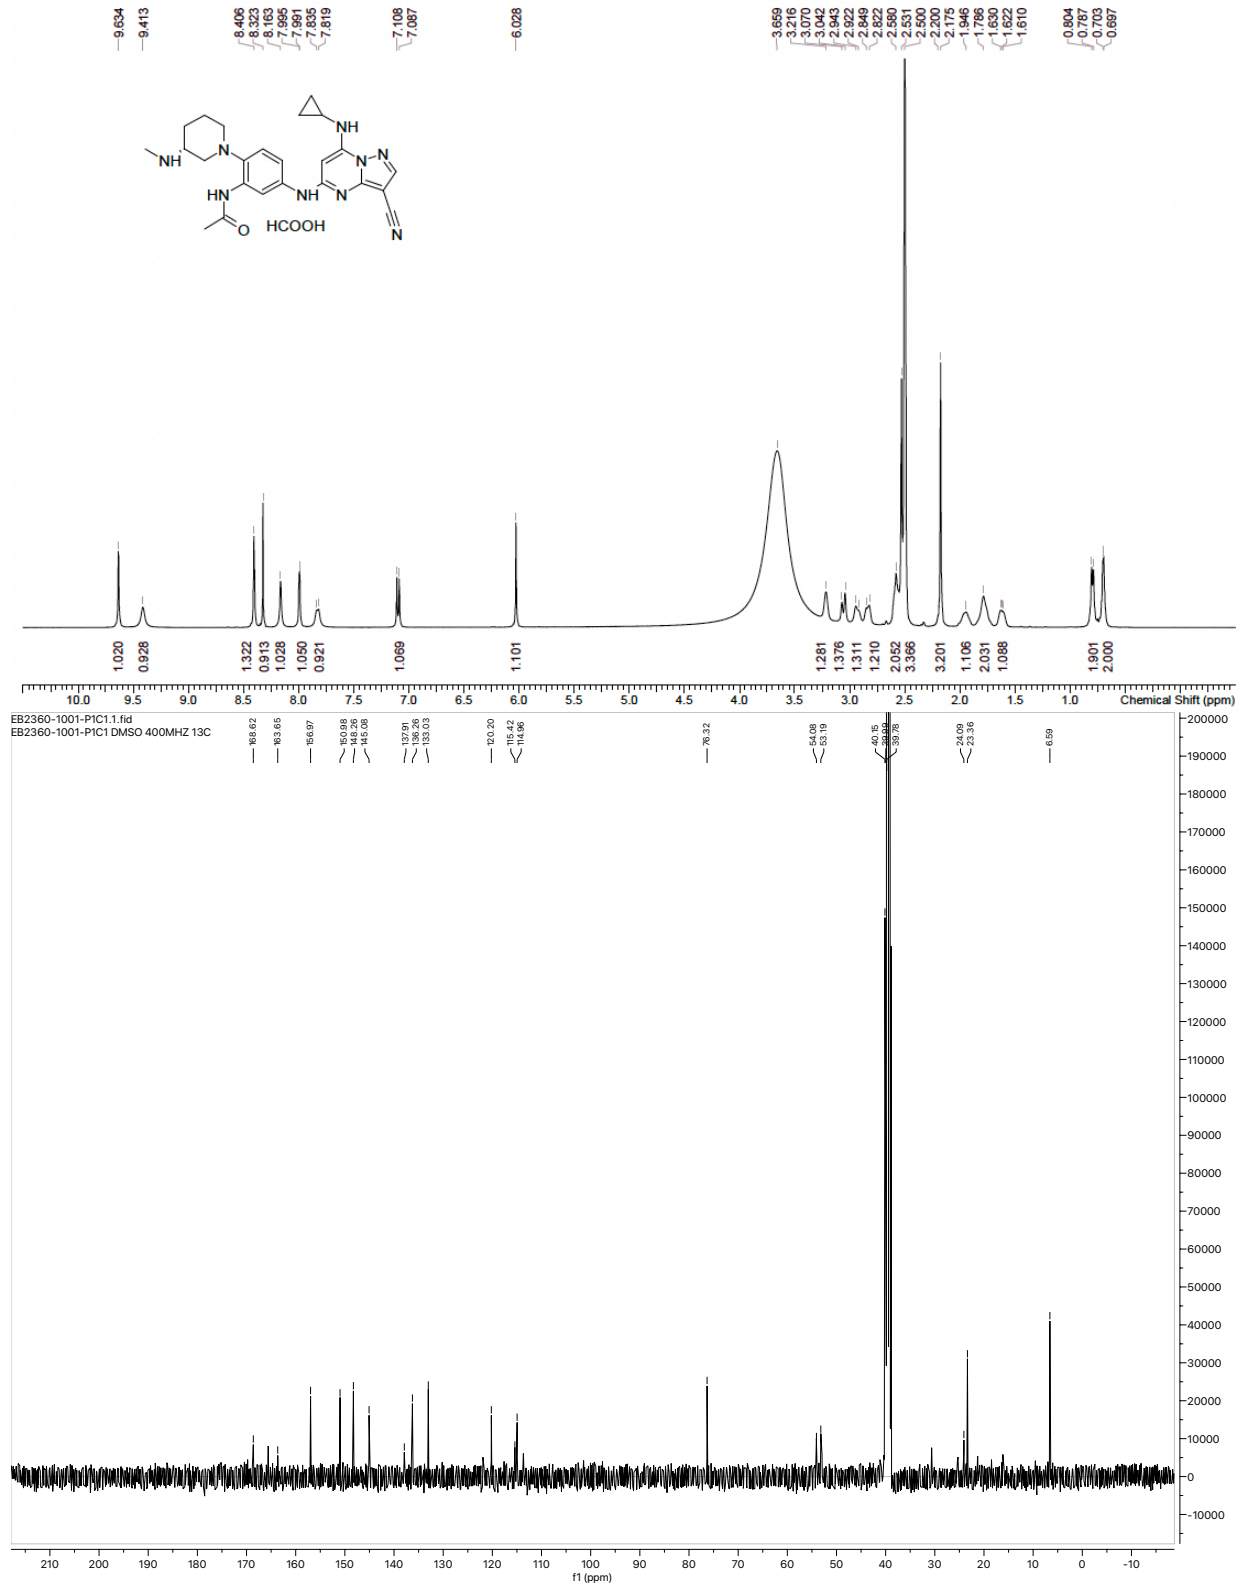

<Chromatogram>

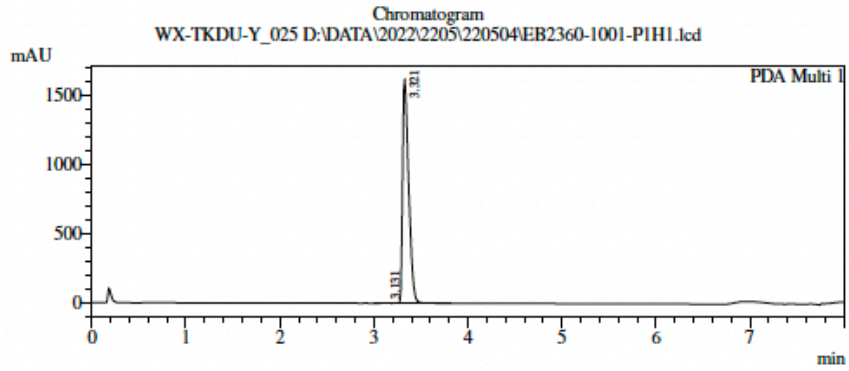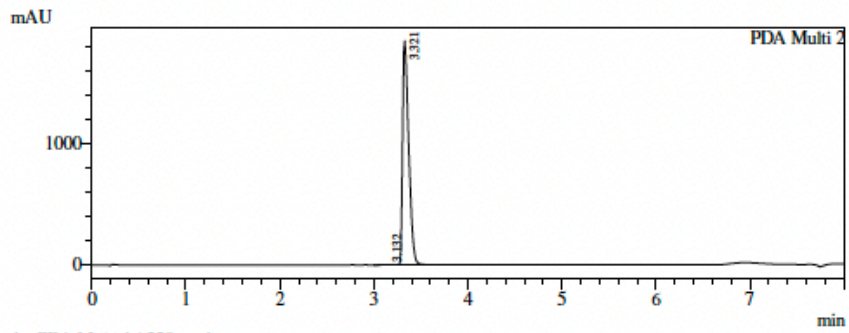

- 1 PDA Multi 1 / 220nm 4nm
- 2 PDA Multi 2 / 254nm 4nm

Integration Result

PeakTable

Ch1 220nm 4nm

| Peak# | Ret. Time | Height  | Height % | Area    | Area %  |
|-------|-----------|---------|----------|---------|---------|
| 1     | 3.131     | 1033    | 0.064    | 6654    | 0.091   |
| 2     | 3.321     | 1622252 | 99.936   | 7297195 | 99.909  |
| Total |           | 1623285 | 100.000  | 7303848 | 100.000 |

PeakTable

Ch2 254nm 4nm

| Peak# | Ret. Time | Height  | Height % | Area    | Area %  |
|-------|-----------|---------|----------|---------|---------|
| 1     | 3.132     | 1380    | 0.074    | 8612    | 0.103   |
| 2     | 3.321     | 1854411 | 99.926   | 8393331 | 99.897  |
| Total |           | 1855790 | 100.000  | 8401943 | 100.000 |

PeakTable

Ch3

# NMR and HPLC spectra of 2c:

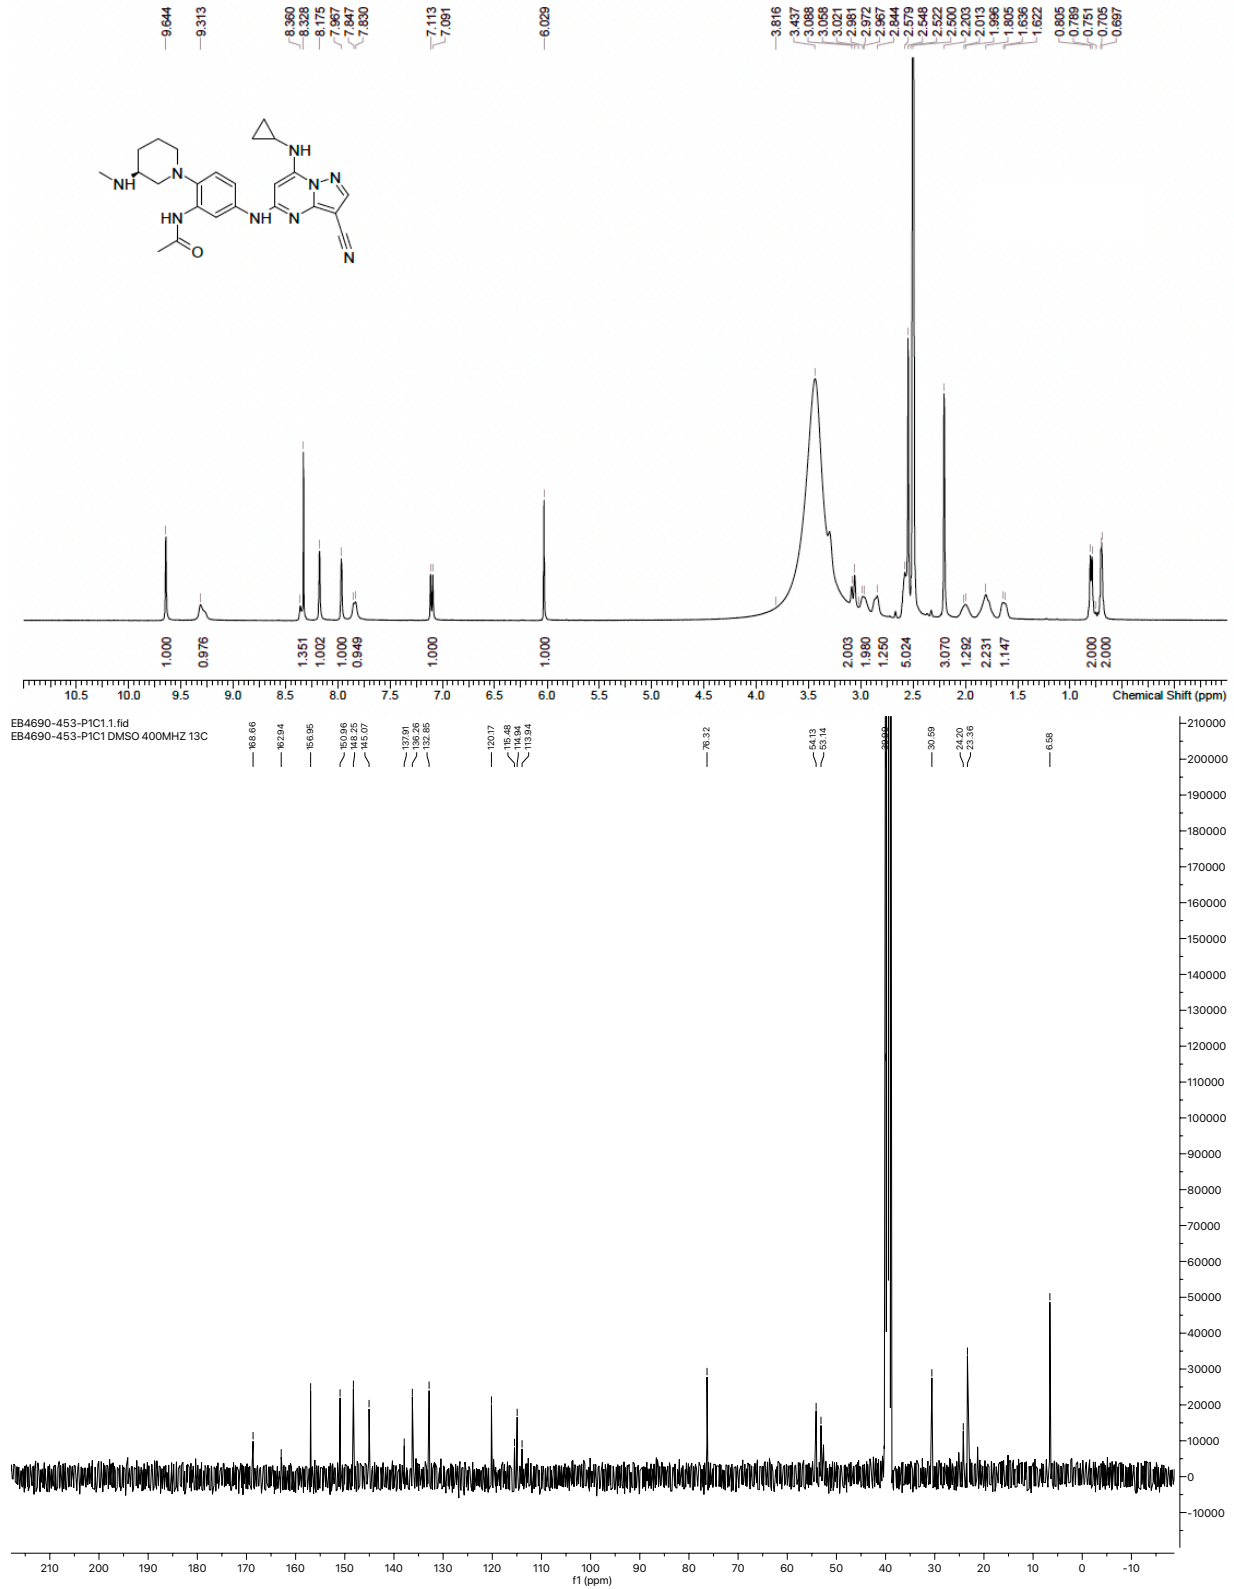

<Chromatogram>

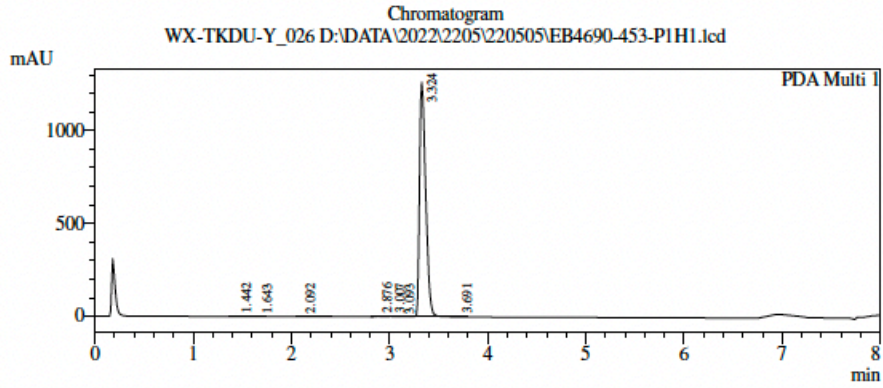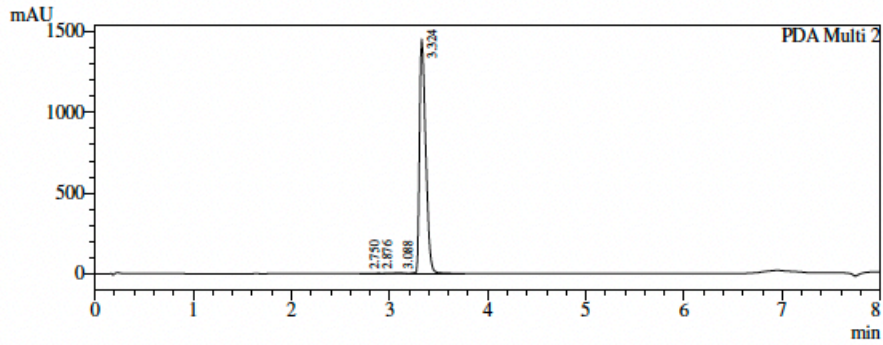

- 1 PDA Multi 1 / 220nm 4nm
- 2 PDA Multi 2 / 254nm 4nm

Integration Result

| Peak# | Ret. Time | Height  | Height % | Area    | Area %  |
|-------|-----------|---------|----------|---------|---------|
| 1     | 1.442     | 669     | 0.052    | 3821    | 0.068   |
| 2     | 1.643     | 904     | 0.071    | 3964    | 0.071   |
| 3     | 2.092     | 936     | 0.073    | 4694    | 0.084   |
| 4     | 2.876     | 2818    | 0.221    | 8102    | 0.145   |
| 5     | 3.007     | 2896    | 0.227    | 11392   | 0.204   |
| 6     | 3.093     | 2306    | 0.181    | 9965    | 0.178   |
| 7     | 3.324     | 1262348 | 99.123   | 5553022 | 99.206  |
| 8     | 3.691     | 642     | 0.050    | 2505    | 0.045   |
| Total |           | 1273520 | 100.000  | 5597466 | 100.000 |

PeakTable

Ch2 254nm 4nm

| Peak# | Ret. Time | Height  | Height % | Area    | Area %  |
|-------|-----------|---------|----------|---------|---------|
| 1     | 2.750     | 704     | 0.048    | 1976    | 0.031   |
| 2     | 2.876     | 2048    | 0.141    | 5918    | 0.092   |
| 3     | 3.088     | 2344    | 0.161    | 17110   | 0.266   |
| 4     | 3.324     | 1452495 | 99.650   | 6407337 | 99.611  |
| Total |           | 1457591 | 100.000  | 6432342 | 100.000 |

PeakTable

Ch3

# NMR and HPLC spectra of 2d:

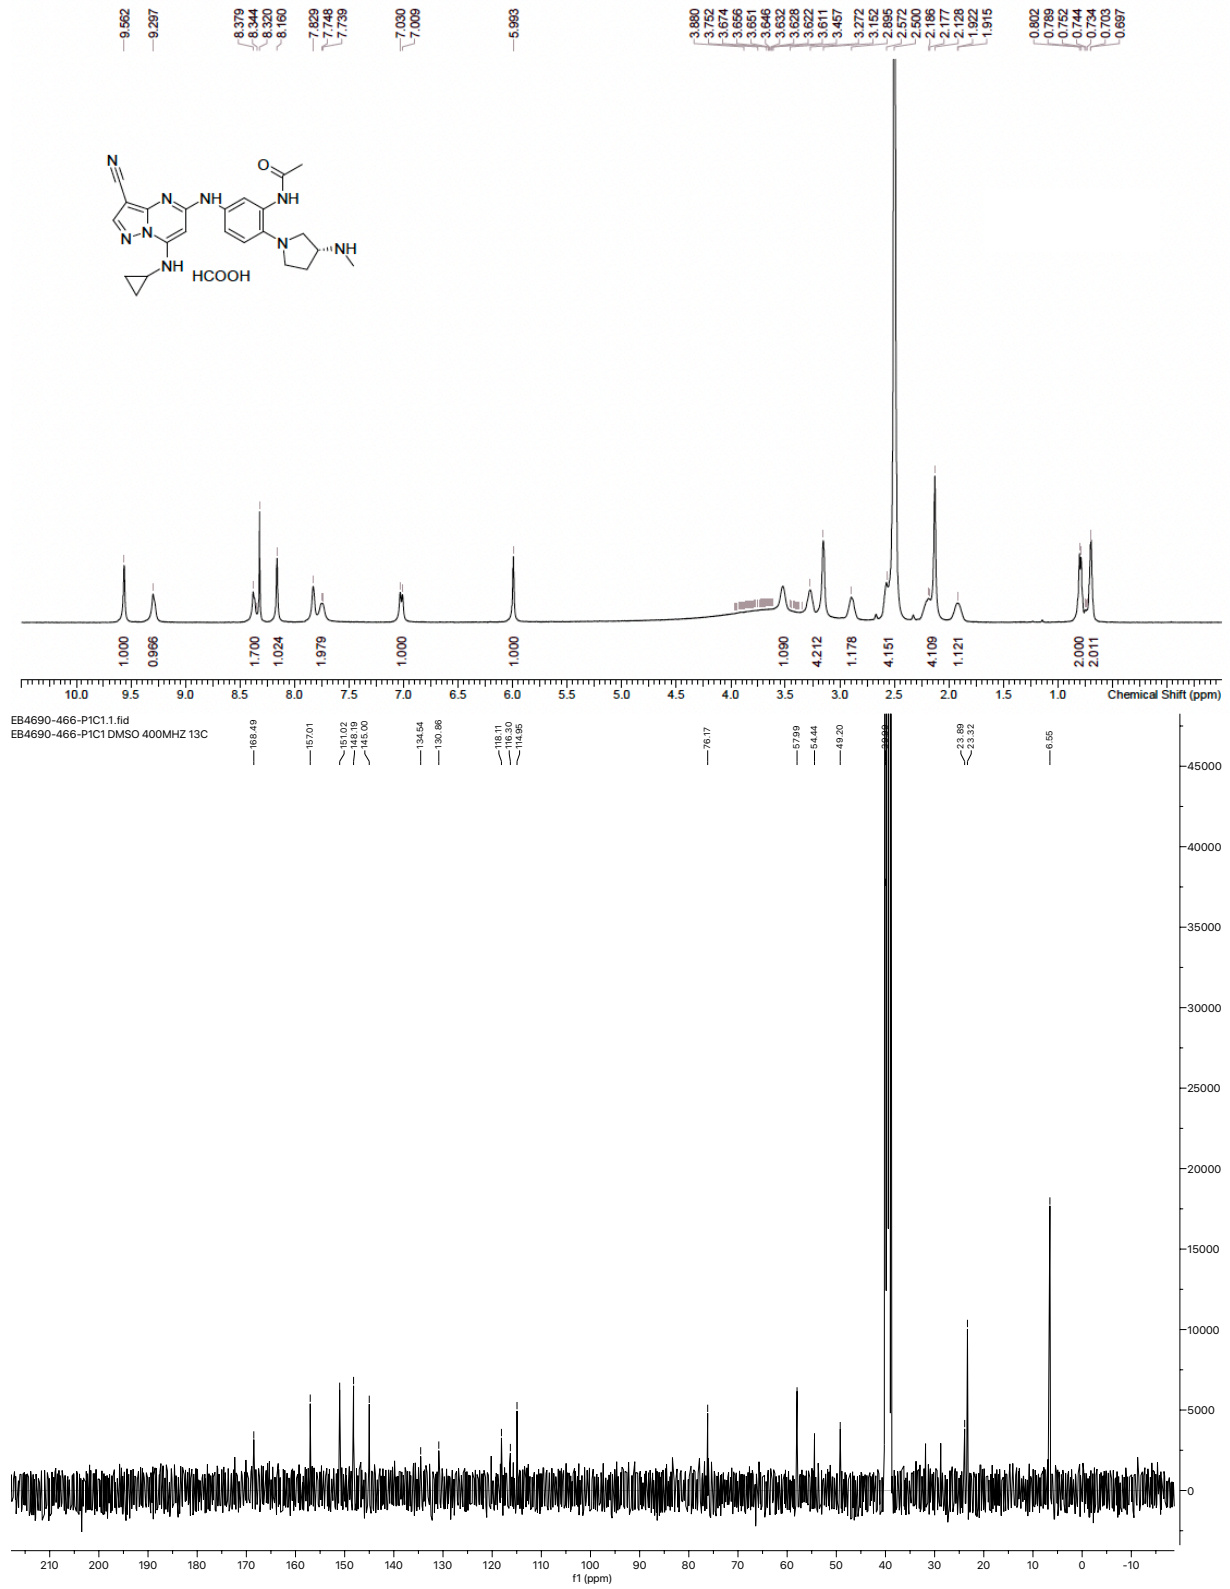

<Chromatogram>

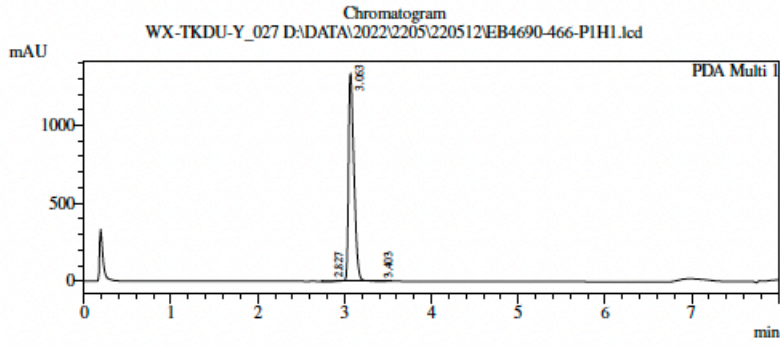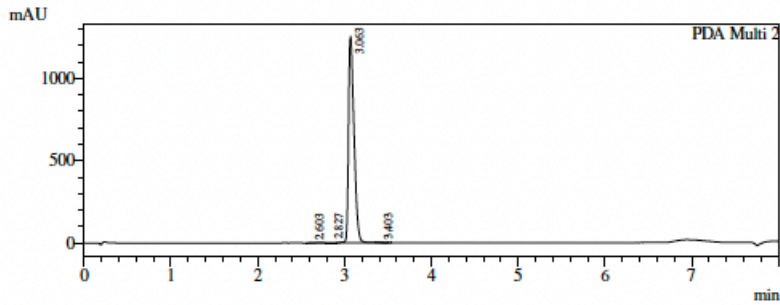

- 1 PDA Multi 1 / 220nm 4nm
- 2 PDA Multi 2 / 254nm 4nm

Integration Result

PeakTable

Ch1 220nm 4nm

| Peak# | Ret. Time | Height  | Height % | Area    | Area %  |
|-------|-----------|---------|----------|---------|---------|
| 1     | 2.827     | 537     | 0.040    | 3741    | 0.064   |
| 2     | 3.063     | 1335188 | 99.896   | 5817773 | 99.882  |
| 3     | 3.403     | 847     | 0.063    | 3116    | 0.054   |
| Total |           | 1336572 | 100.000  | 5824631 | 100.000 |

PeakTable

Ch2 254nm 4nm

| Peak# | Ret. Time | Height  | Height % | Area    | Area %  |
|-------|-----------|---------|----------|---------|---------|
| 1     | 2.603     | 311     | 0.025    | 2263    | 0.041   |
| 2     | 2.827     | 596     | 0.047    | 4191    | 0.076   |
| 3     | 3.063     | 1254815 | 99.850   | 5523486 | 99.812  |
| 4     | 3.403     | 981     | 0.078    | 3952    | 0.071   |
| Total |           | 1256703 | 100.000  | 5533892 | 100.000 |

PeakTable

Ch3

# NMR and HPLC spectra of 2e:

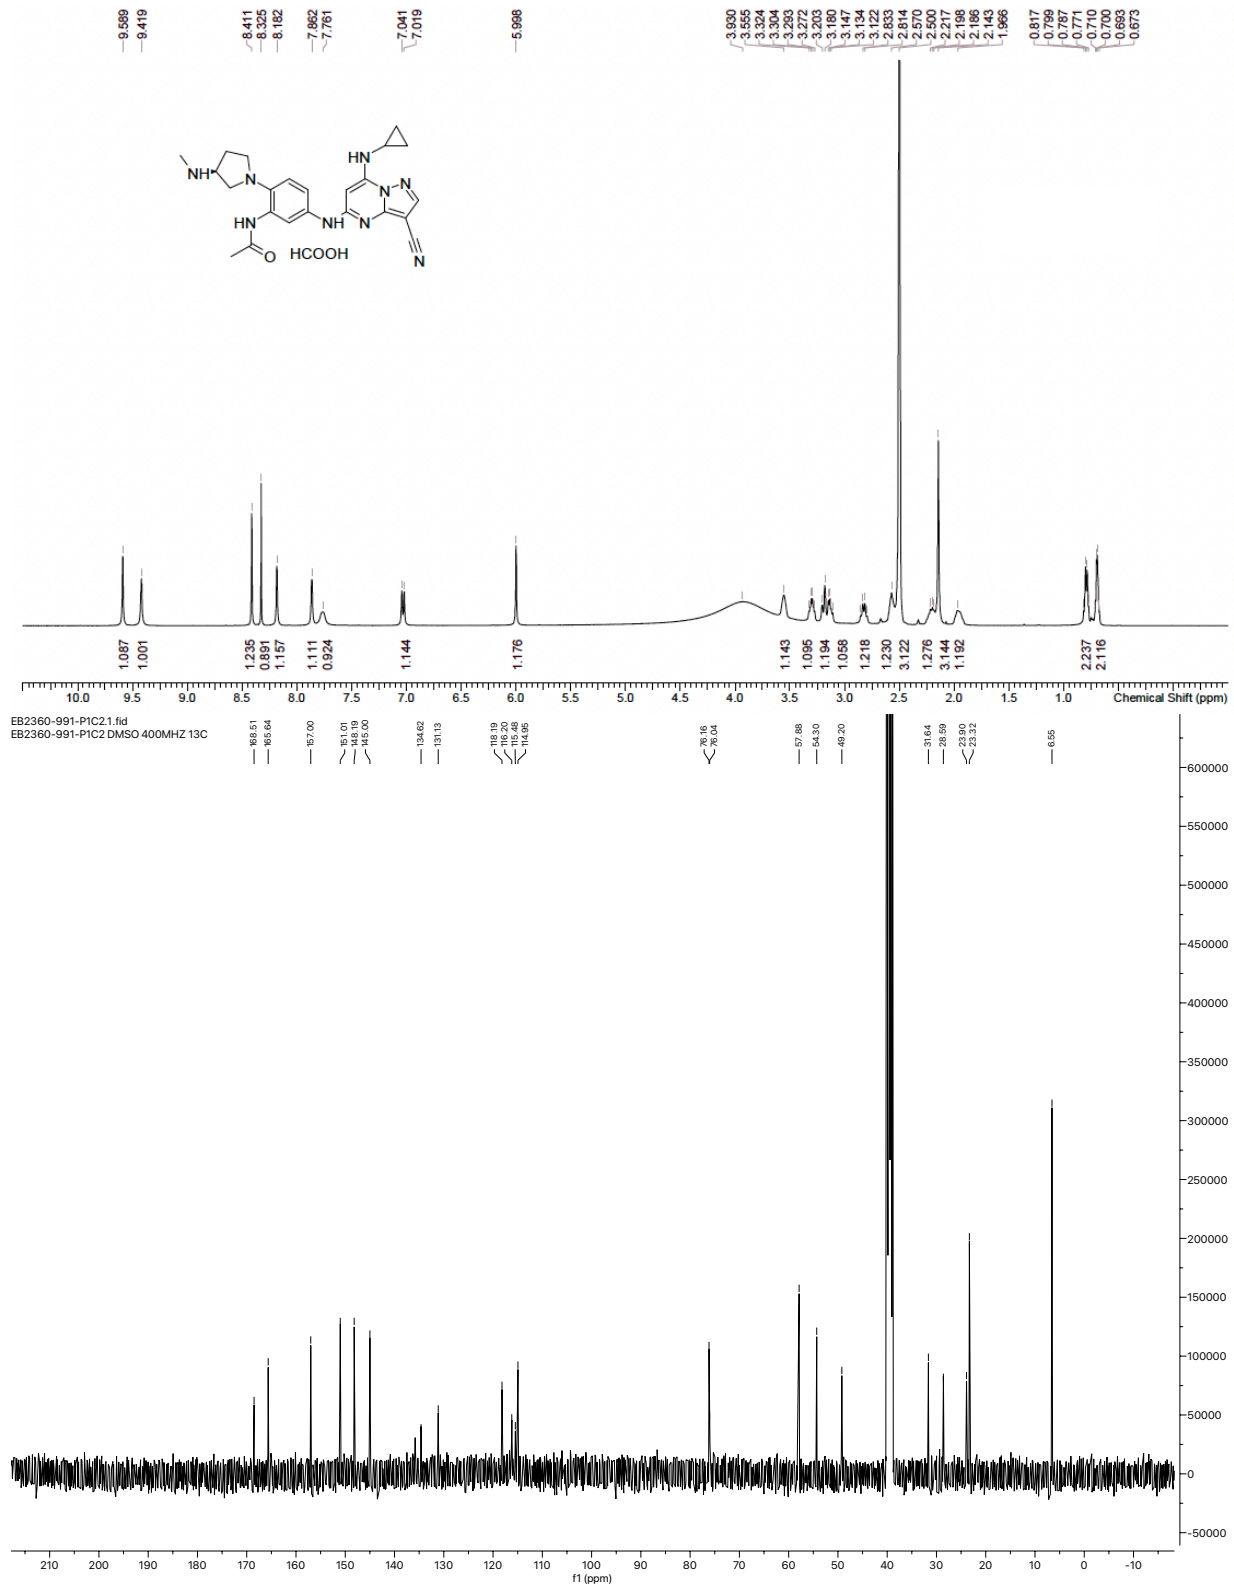

<Chromatogram>

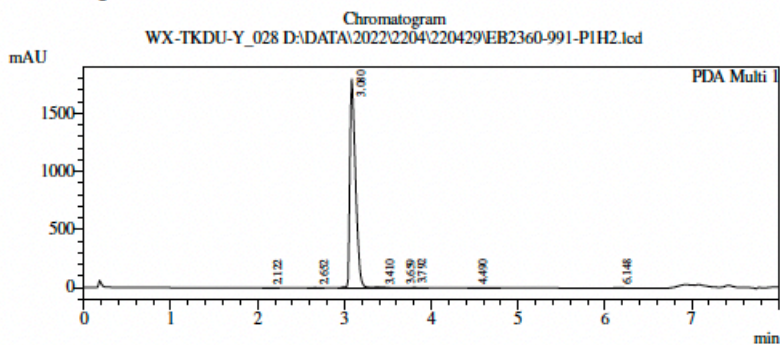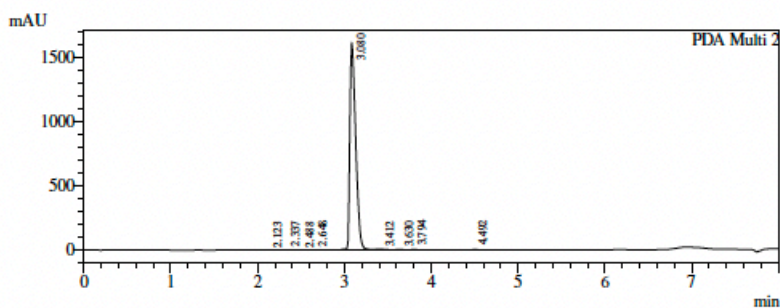

- 1 PDA Multi 1 / 220nm 4nm
- 2 PDA Multi 2 / 254nm 4nm

Integration Result

PeakTable

Ch1 220nm 4nm

| Peak# | Ret. Time | Height  | Height % | Area    | Area %  |
|-------|-----------|---------|----------|---------|---------|
| 1     | 2.122     | 879     | 0.049    | 3332    | 0.041   |
| 2     | 2.652     | 1488    | 0.082    | 6243    | 0.076   |
| 3     | 3.080     | 1795487 | 99.464   | 8126700 | 99.409  |
| 4     | 3.410     | 1132    | 0.063    | 4311    | 0.053   |
| 5     | 3.659     | 503     | 0.028    | 3100    | 0.038   |
| 6     | 3.792     | 1757    | 0.097    | 6196    | 0.076   |
| 7     | 4.490     | 1052    | 0.058    | 7485    | 0.092   |
| 8     | 6.148     | 2873    | 0.159    | 17664   | 0.216   |
| Total |           | 1805171 | 100.000  | 8175032 | 100.000 |

PeakTable

Ch2 254nm 4nm

| Peak# | Ret. Time | Height  | Height % | Area    | Area %  |
|-------|-----------|---------|----------|---------|---------|
| 1     | 2.123     | 367     | 0.023    | 1856    | 0.024   |
| 2     | 2.337     | 647     | 0.040    | 2470    | 0.032   |
| 3     | 2.488     | 678     | 0.042    | 2791    | 0.037   |
| 4     | 2.648     | 1147    | 0.071    | 5862    | 0.077   |
| 5     | 3.080     | 1618889 | 99.554   | 7573209 | 99.586  |
| 6     | 3.412     | 1503    | 0.092    | 5688    | 0.075   |
| 7     | 3.630     | 616     | 0.038    | 3590    | 0.047   |
| 8     | 3.794     | 1405    | 0.086    | 4974    | 0.065   |
| 9     | 4.492     | 886     | 0.054    | 4223    | 0.056   |
| Total |           | 1626137 | 100.000  | 7604665 | 100.000 |

PeakTable

Ch3



# NMR and HPLC spectra of 2f:

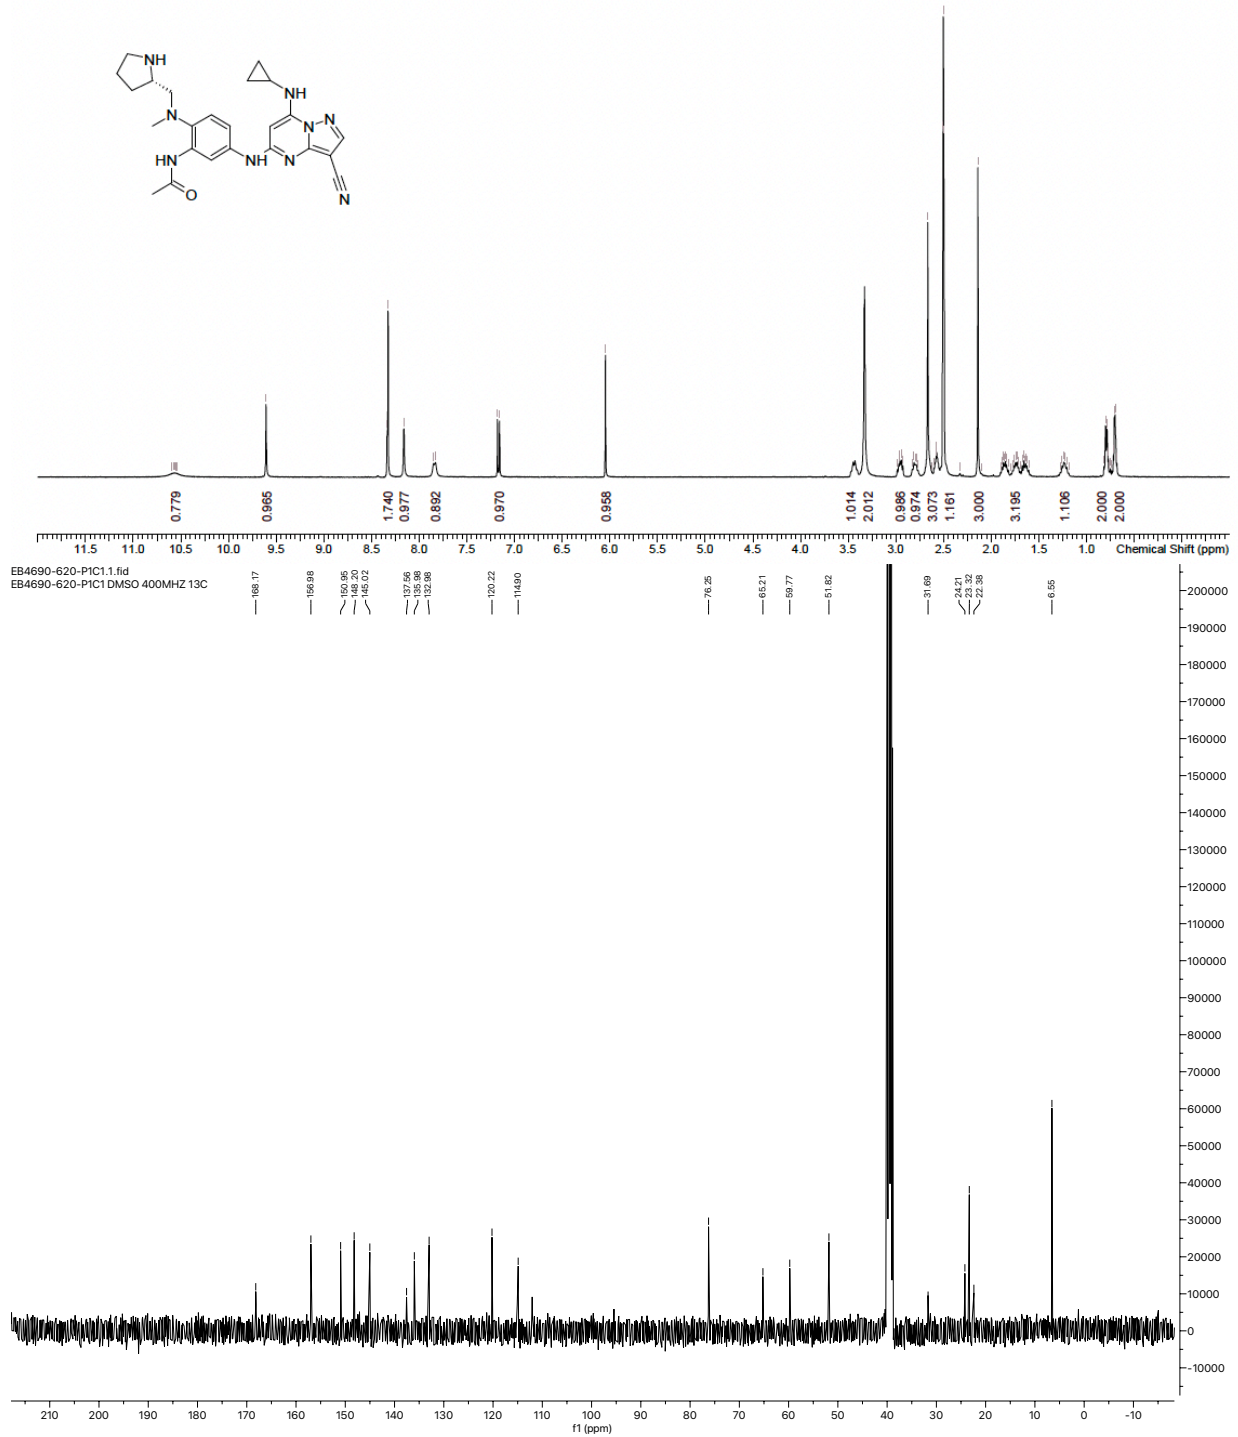

<Chromatogram>

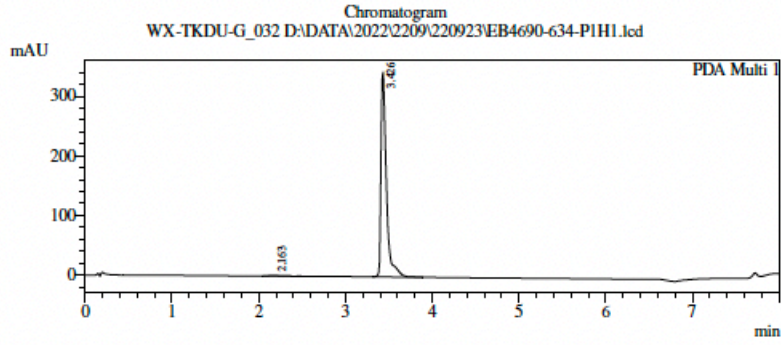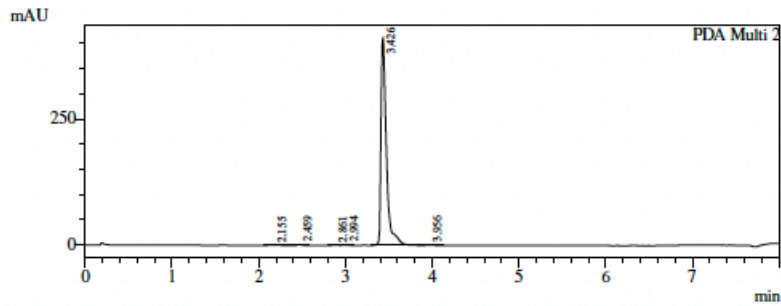

- 1 PDA Multi 1 / 220nm 4nm
- 2 PDA Multi 2 / 254nm 4nm

Integration Result

PeakTable

PDA Ch1 220nm 4nm

| Peak# | Ret. Time | Height | Height % | Area    | Area %  |
|-------|-----------|--------|----------|---------|---------|
| 1     | 2.163     | 939    | 0.273    | 9684    | 0.645   |
| 2     | 3.426     | 343510 | 99.727   | 1491336 | 99.355  |
| Total |           | 344450 | 100.000  | 1501019 | 100.000 |

PeakTable

PDA Ch2 254nm 4nm

| Peak# | Ret. Time | Height | Height % | Area    | Area %  |
|-------|-----------|--------|----------|---------|---------|
| 1     | 2.155     | 550    | 0.132    | 4596    | 0.254   |
| 2     | 2.459     | 1237   | 0.297    | 3627    | 0.200   |
| 3     | 2.861     | 741    | 0.178    | 2560    | 0.141   |
| 4     | 2.994     | 573    | 0.137    | 2121    | 0.117   |
| 5     | 3.426     | 412783 | 99.069   | 1792504 | 99.025  |
| 6     | 3.956     | 777    | 0.186    | 4750    | 0.262   |
| Total |           | 416661 | 100.000  | 1810158 | 100.000 |

PeakTable

PDA Ch3

# NMR and HPLC spectra of 2g:

<sup>1</sup>H NMR peaks (ppm): 9.687, 8.927, 8.338, 8.200, 8.070, 7.897, 7.879, 7.163, 7.141, 6.037, 3.270, 2.953, 2.579, 2.500, 2.486, 2.162, 0.824, 0.806, 0.794, 0.778, 0.757, 0.719, 0.710, 0.702, 0.682.

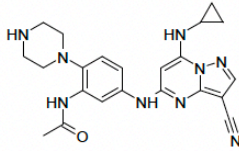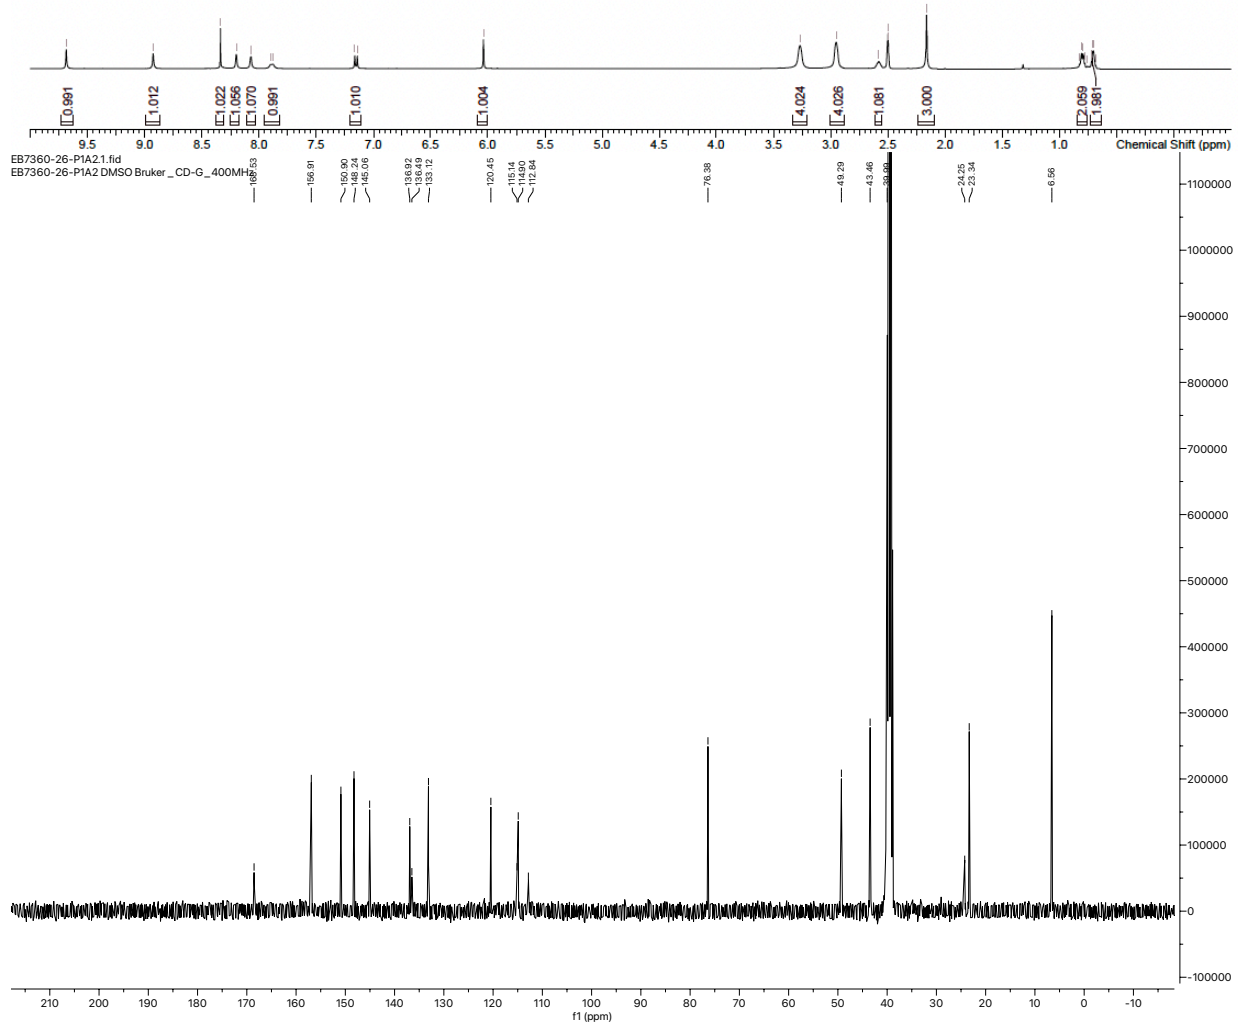

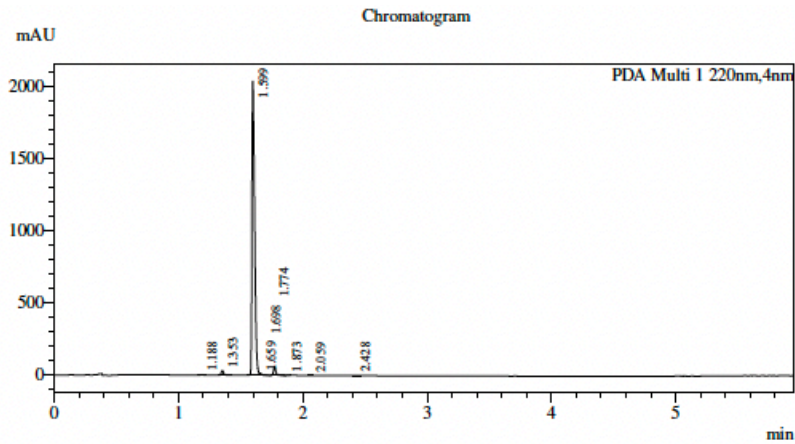

=====  
**Integration Result**  
 =====

| PDA Ch1 220nm |           |           |         |         |         |         |
|---------------|-----------|-----------|---------|---------|---------|---------|
| Peak#         | Ret. Time | USP Width | Height  | Height% | Area    | Area%   |
| 1             | 1.188     | 0.029     | 2840    | 0.132   | 3255    | 0.102   |
| 2             | 1.353     | 0.031     | 31659   | 1.471   | 39398   | 1.233   |
| 3             | 1.599     | 0.040     | 2040631 | 94.802  | 3056550 | 95.644  |
| 4             | 1.659     | 0.346     | 10296   | 0.478   | 11494   | 0.360   |
| 5             | 1.698     | 0.154     | 2754    | 0.128   | 6020    | 0.188   |
| 6             | 1.774     | 0.031     | 59167   | 2.749   | 72616   | 2.272   |
| 7             | 1.873     | 0.033     | 2499    | 0.116   | 2954    | 0.092   |
| 8             | 2.059     | 0.030     | 1139    | 0.053   | 1324    | 0.041   |
| 9             | 2.428     | 0.037     | 1527    | 0.071   | 2137    | 0.067   |
| <b>Total</b>  |           |           | 2152512 | 100.000 | 3195748 | 100.000 |

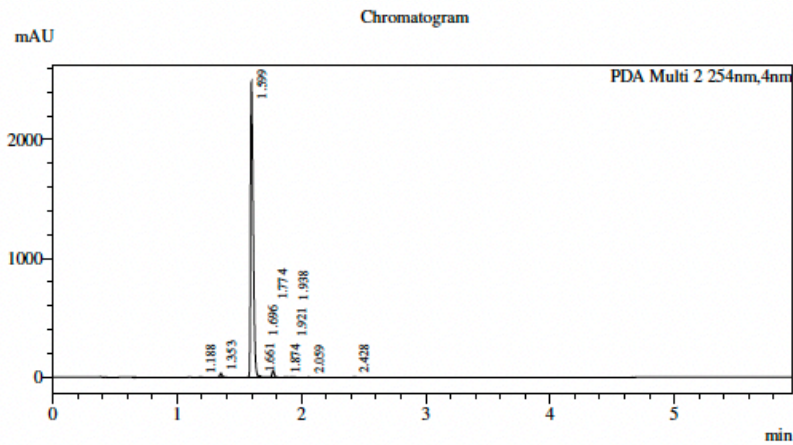

=====  
**Integration Result**  
 =====

| PDA Ch2 254nm |           |           |         |         |         |         |
|---------------|-----------|-----------|---------|---------|---------|---------|
| Peak#         | Ret. Time | USP Width | Height  | Height% | Area    | Area%   |
| 1             | 1.188     | 0.029     | 2055    | 0.079   | 2348    | 0.061   |
| 2             | 1.353     | 0.031     | 33133   | 1.273   | 41448   | 1.082   |
| 3             | 1.599     | 0.040     | 2483078 | 95.403  | 3680072 | 96.064  |
| 4             | 1.661     | 0.132     | 13669   | 0.525   | 15936   | 0.416   |
| 5             | 1.696     | 0.103     | 3076    | 0.118   | 5824    | 0.152   |
| 6             | 1.774     | 0.031     | 57759   | 2.219   | 71882   | 1.876   |
| 7             | 1.874     | 0.038     | 2793    | 0.107   | 4013    | 0.105   |
| 8             | 1.921     | 0.071     | 2304    | 0.089   | 3326    | 0.087   |
| 9             | 1.938     | 0.178     | 2026    | 0.078   | 2223    | 0.058   |
| 10            | 2.059     | 0.031     | 1067    | 0.041   | 1231    | 0.032   |
| 11            | 2.428     | 0.038     | 1775    | 0.068   | 2539    | 0.066   |
| <b>Total</b>  |           |           | 2602737 | 100.000 | 3830842 | 100.000 |

# NMR and HPLC spectra of 2i:

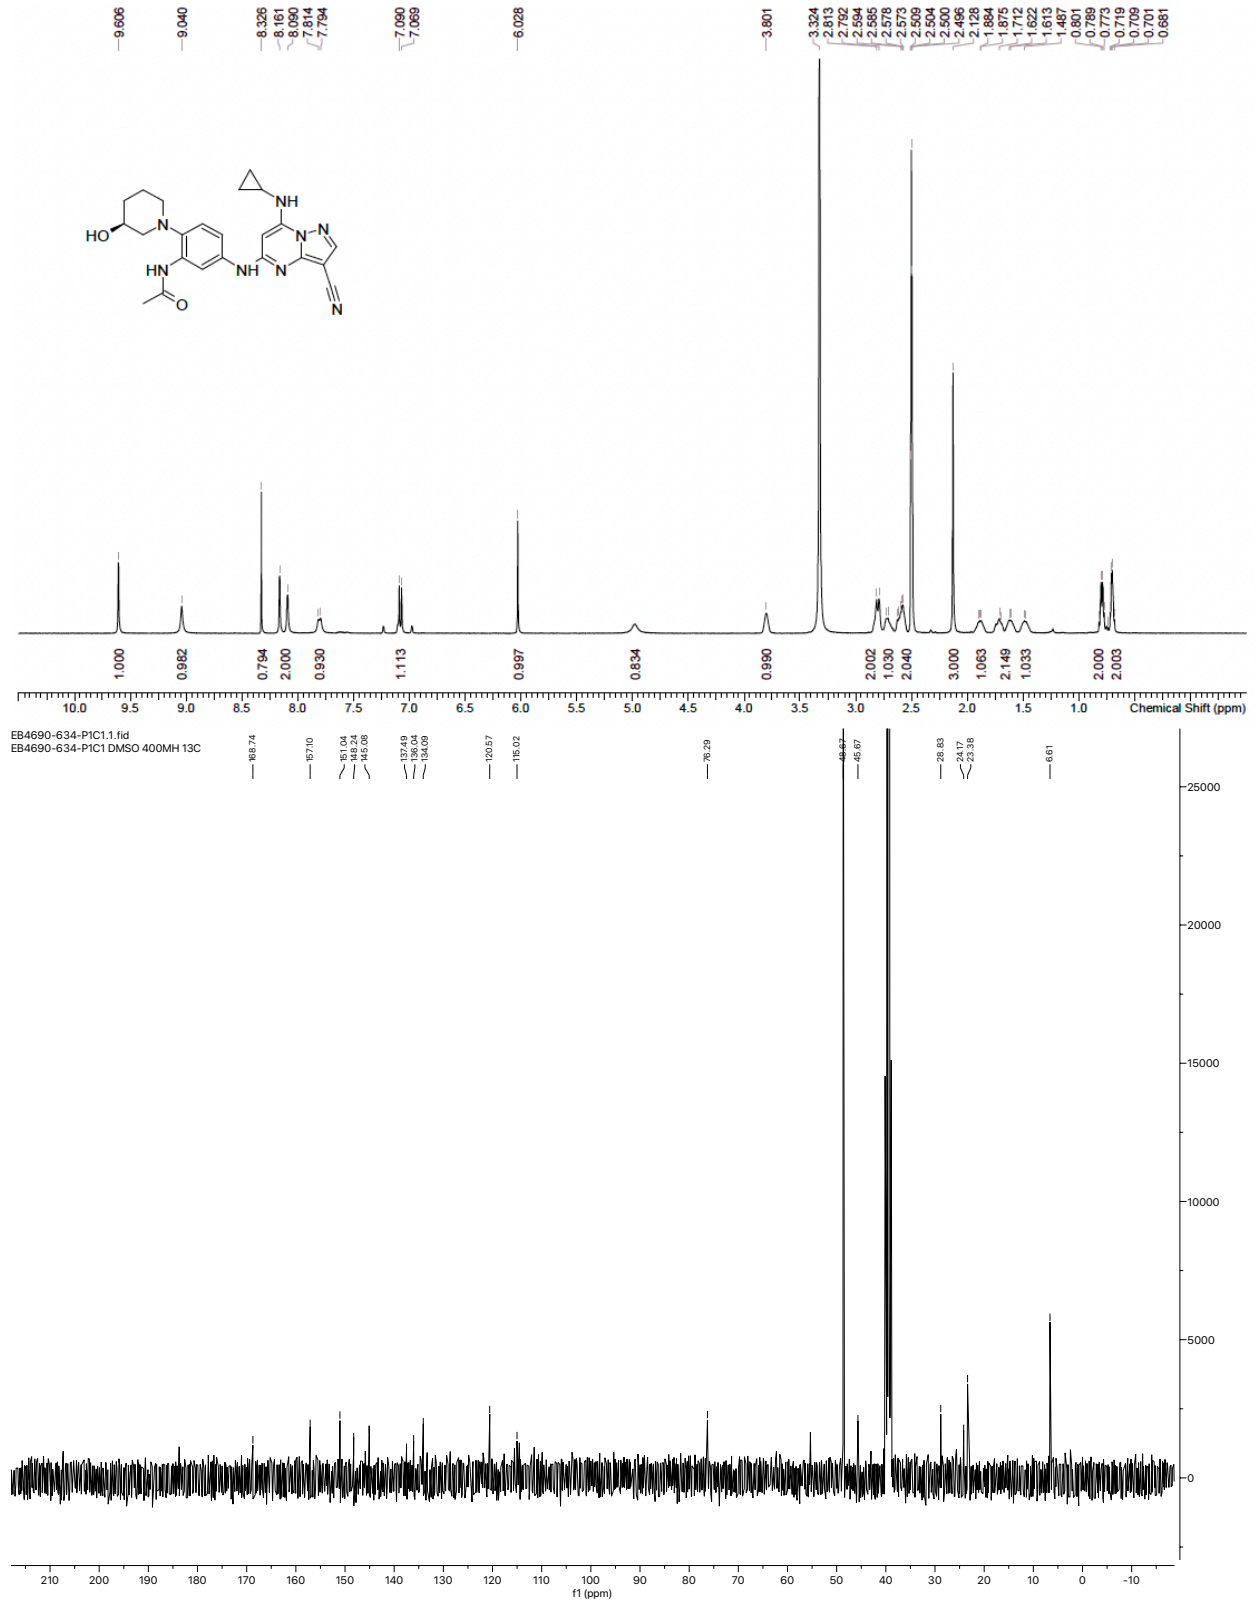

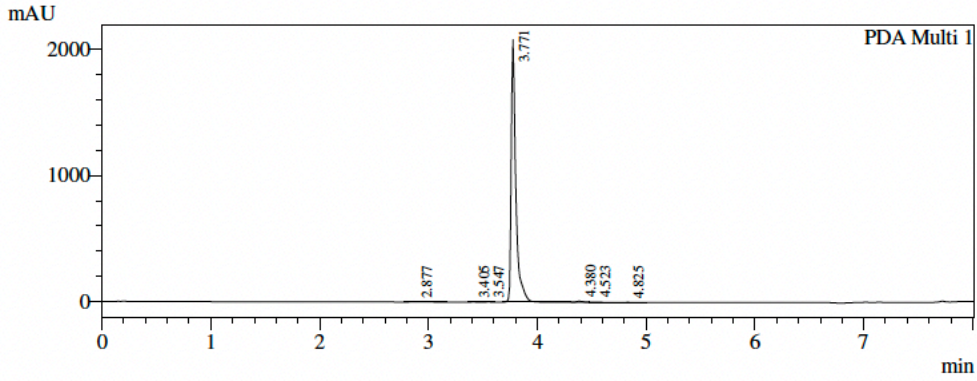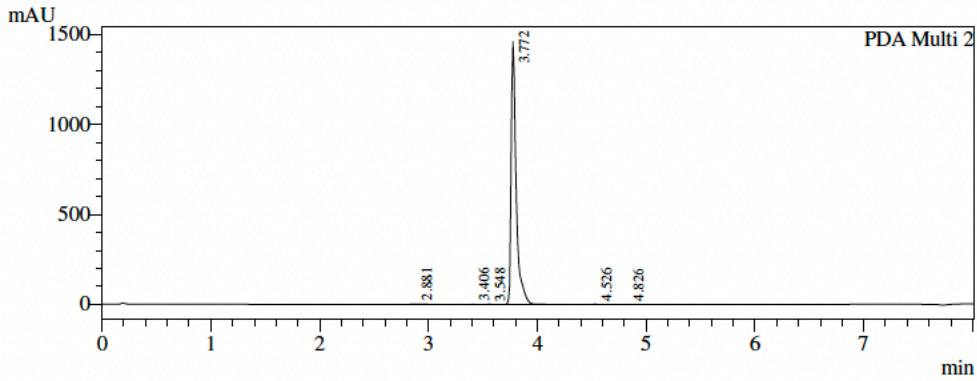

- 1 PDA Multi 1 / 220nm 4nm
- 2 PDA Multi 2 / 254nm 4nm

=====  
 Integration Result  
 =====

PeakTable

PDA Ch1 220nm 4nm

| Peak# | Ret. Time | Height  | Height % | Area    | Area %  |
|-------|-----------|---------|----------|---------|---------|
| 1     | 2.877     | 1163    | 0.056    | 12629   | 0.206   |
| 2     | 3.405     | 1255    | 0.060    | 3405    | 0.056   |
| 3     | 3.547     | 1153    | 0.055    | 3183    | 0.052   |
| 4     | 3.771     | 2077942 | 99.328   | 6071865 | 98.995  |
| 5     | 4.380     | 7986    | 0.382    | 30941   | 0.504   |
| 6     | 4.523     | 1775    | 0.085    | 8301    | 0.135   |
| 7     | 4.825     | 725     | 0.035    | 3158    | 0.051   |
| Total |           | 2091998 | 100.000  | 6133482 | 100.000 |

PeakTable

PDA Ch2 254nm 4nm

| Peak# | Ret. Time | Height  | Height % | Area    | Area %  |
|-------|-----------|---------|----------|---------|---------|
| 1     | 2.881     | 1347    | 0.092    | 15542   | 0.330   |
| 2     | 3.406     | 768     | 0.052    | 2115    | 0.045   |
| 3     | 3.548     | 1061    | 0.072    | 2893    | 0.061   |
| 4     | 3.772     | 1459960 | 99.699   | 4685327 | 99.465  |
| 5     | 4.526     | 647     | 0.044    | 2310    | 0.049   |
| 6     | 4.826     | 584     | 0.040    | 2325    | 0.049   |
| Total |           | 1464367 | 100.000  | 4710512 | 100.000 |

PeakTable

PDA Ch3

# NMR and HPLC spectra of 2j:

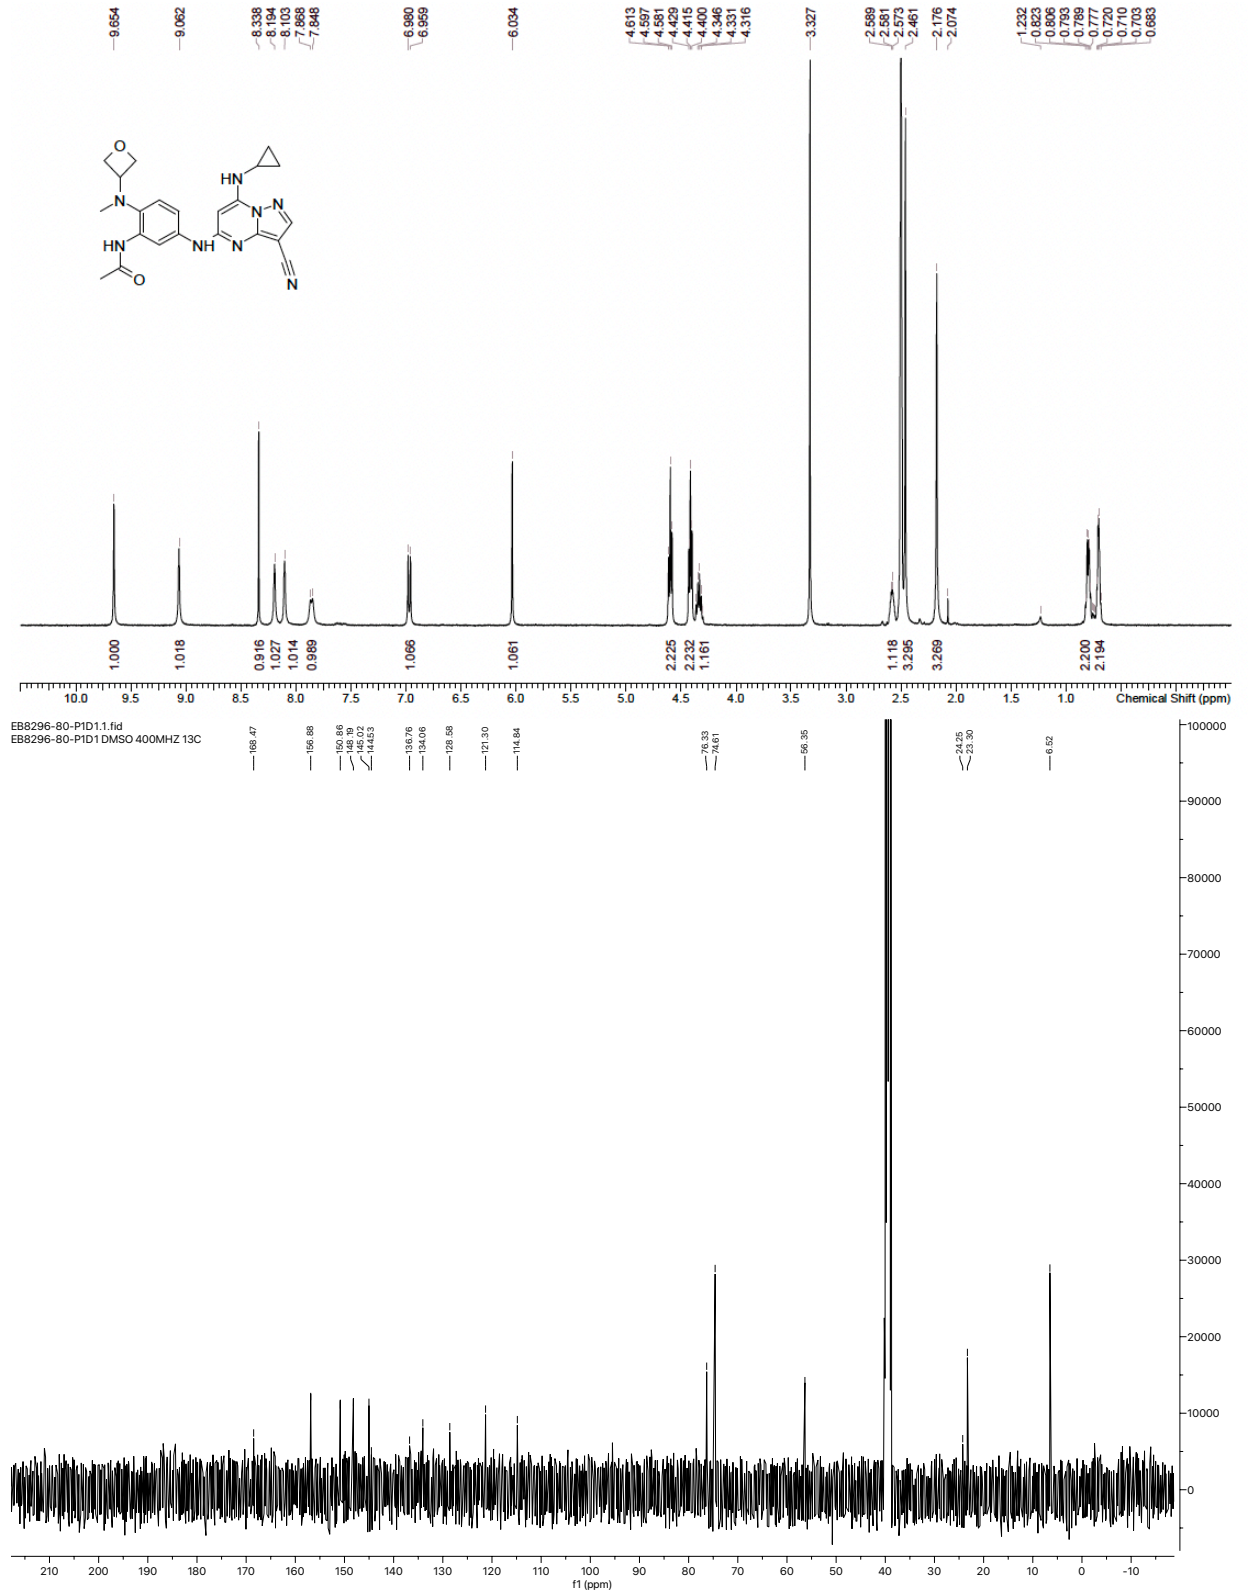

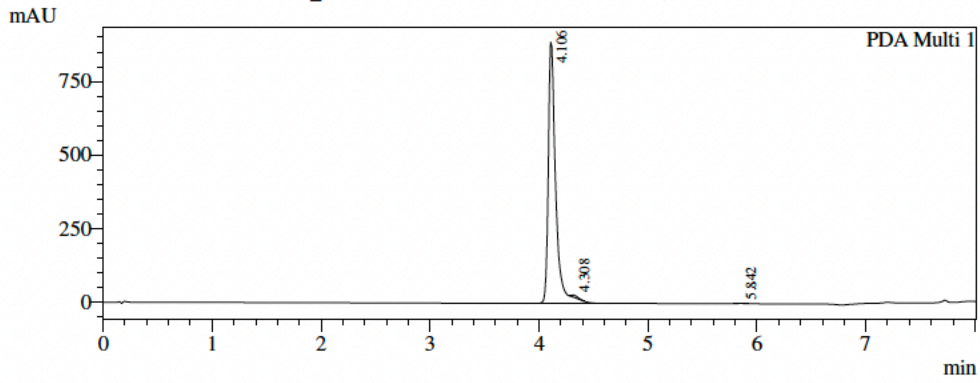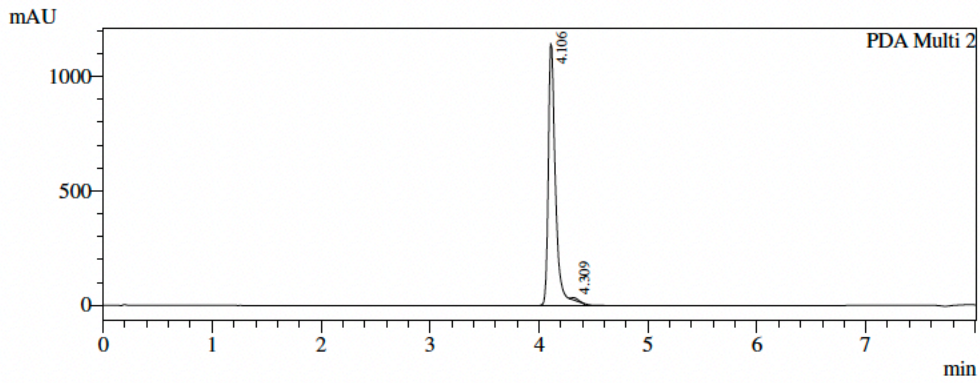

- 1 PDA Multi 1 / 220nm 4nm
- 2 PDA Multi 2 / 254nm 4nm

=====  
 Integration Result  
 =====

PeakTable

PDA Ch1 220nm 4nm

| Peak# | Ret. Time | Height | Height % | Area    | Area %  |
|-------|-----------|--------|----------|---------|---------|
| 1     | 4.106     | 886833 | 99.264   | 4203036 | 99.335  |
| 2     | 4.308     | 5995   | 0.671    | 25736   | 0.608   |
| 3     | 5.842     | 583    | 0.065    | 2384    | 0.056   |
| Total |           | 893411 | 100.000  | 4231157 | 100.000 |

PeakTable

PDA Ch2 254nm 4nm

| Peak# | Ret. Time | Height  | Height % | Area    | Area %  |
|-------|-----------|---------|----------|---------|---------|
| 1     | 4.106     | 1143554 | 99.264   | 5337382 | 99.318  |
| 2     | 4.309     | 8480    | 0.736    | 36639   | 0.682   |
| Total |           | 1152034 | 100.000  | 5374021 | 100.000 |

PeakTable

PDA Ch3



# NMR and HPLC spectra of 2k:

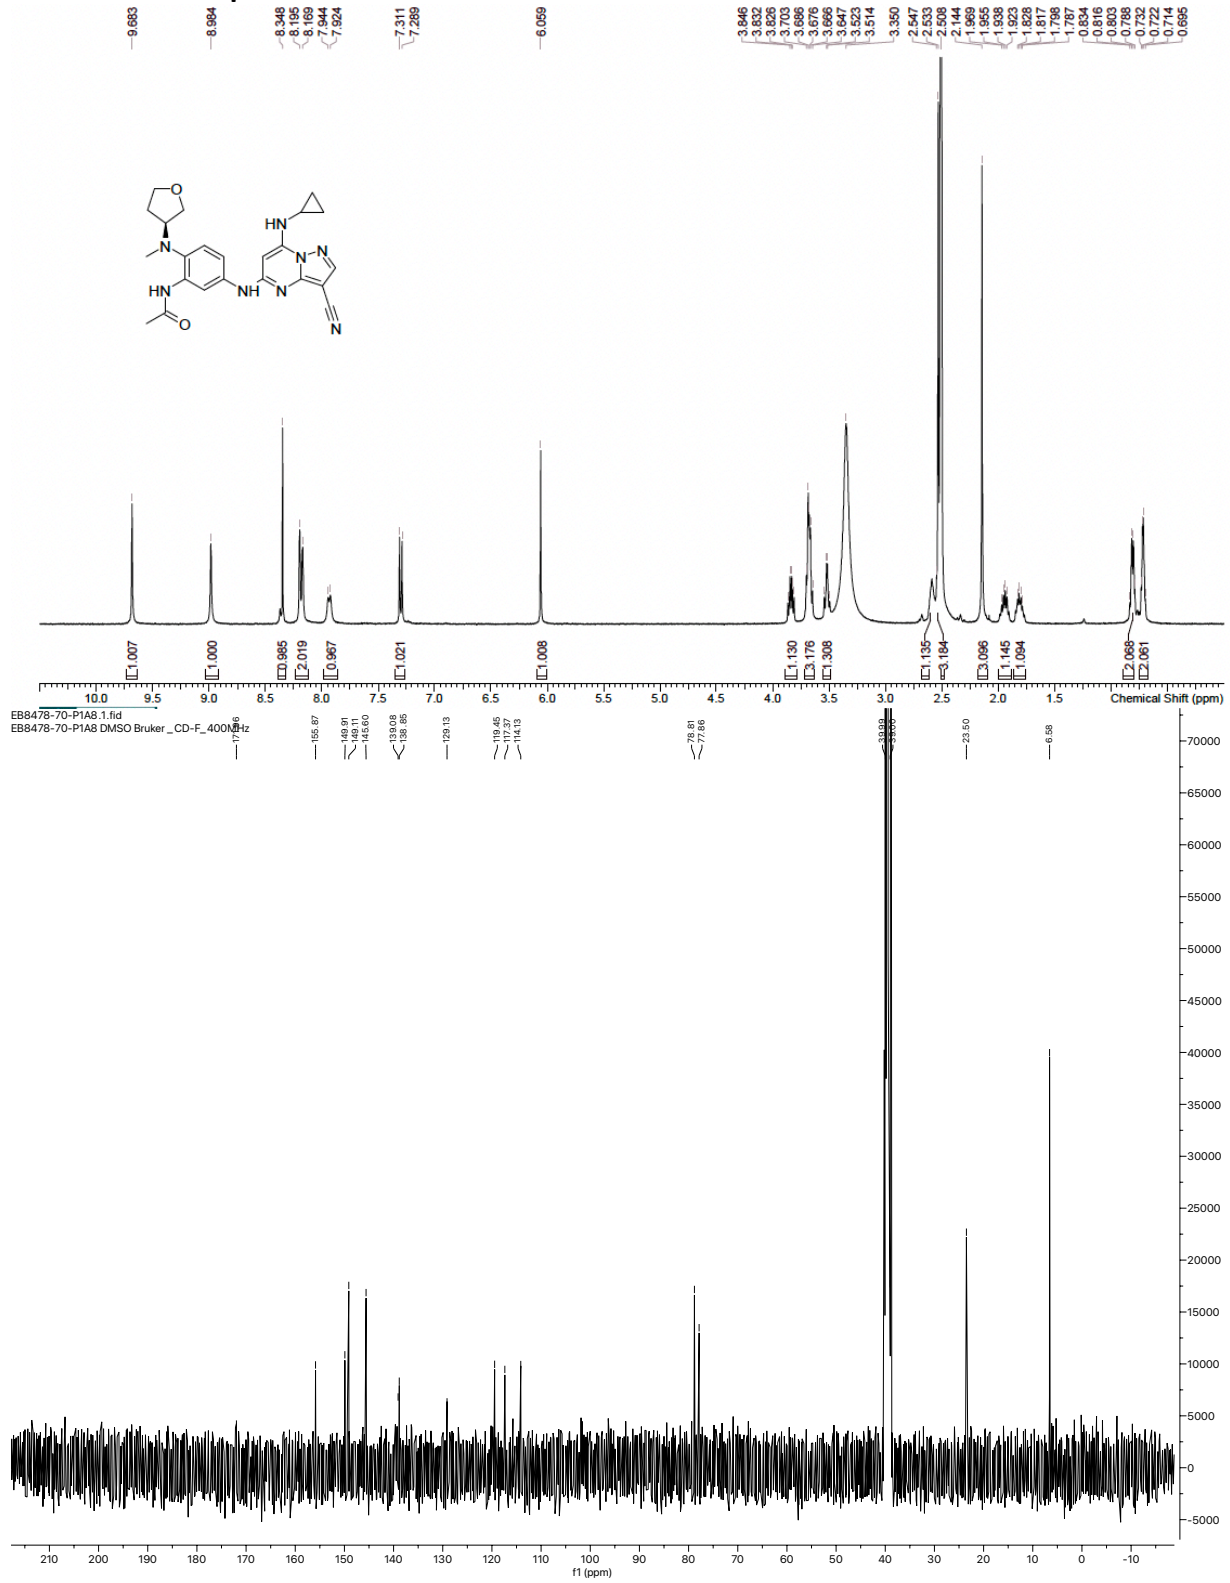

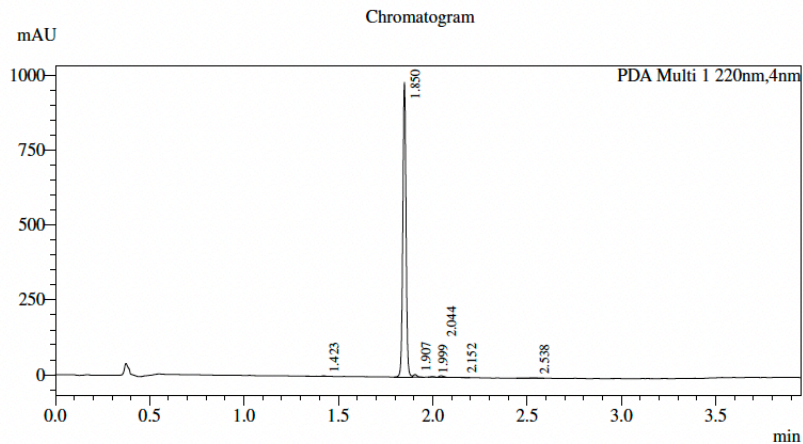

=====  
**Integration Result**  
 =====

| PDA Ch1 220nm |           |           |         |         |         |         |
|---------------|-----------|-----------|---------|---------|---------|---------|
| Peak#         | Ret. Time | USP Width | Height  | Height% | Area    | Area%   |
| 1             | 1.423     | 0.027     | 1466    | 0.146   | 1475    | 0.122   |
| 2             | 1.850     | 0.031     | 985161  | 97.960  | 1174514 | 97.374  |
| 3             | 1.907     | 0.037     | 8679    | 0.863   | 11739   | 0.973   |
| 4             | 1.999     | 0.032     | 2189    | 0.218   | 2584    | 0.214   |
| 5             | 2.044     | 0.043     | 5527    | 0.550   | 9142    | 0.758   |
| 6             | 2.152     | 0.109     | 1245    | 0.124   | 1800    | 0.149   |
| 7             | 2.538     | 0.105     | 1407    | 0.140   | 4939    | 0.409   |
| Total         |           |           | 1005673 | 100.000 | 1206194 | 100.000 |

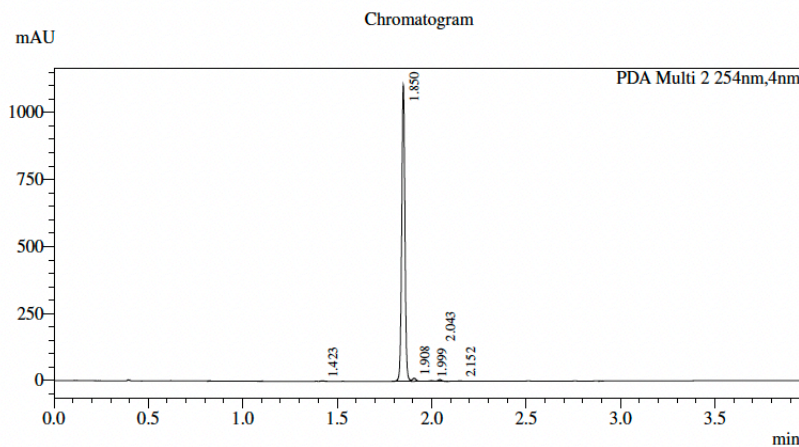

=====  
**Integration Result**  
 =====

| PDA Ch2 254nm |           |           |         |         |         |         |
|---------------|-----------|-----------|---------|---------|---------|---------|
| Peak#         | Ret. Time | USP Width | Height  | Height% | Area    | Area%   |
| 1             | 1.423     | 0.028     | 2106    | 0.187   | 2149    | 0.160   |
| 2             | 1.850     | 0.031     | 1106064 | 98.001  | 1316884 | 97.824  |
| 3             | 1.908     | 0.036     | 11203   | 0.993   | 15210   | 1.130   |
| 4             | 1.999     | 0.033     | 2199    | 0.195   | 2634    | 0.196   |
| 5             | 2.043     | 0.032     | 5955    | 0.528   | 7441    | 0.553   |
| 6             | 2.152     | 0.040     | 1102    | 0.098   | 1854    | 0.138   |
| Total         |           |           | 1128629 | 100.000 | 1346173 | 100.000 |

**NMR and HPLC spectra of 2l:**

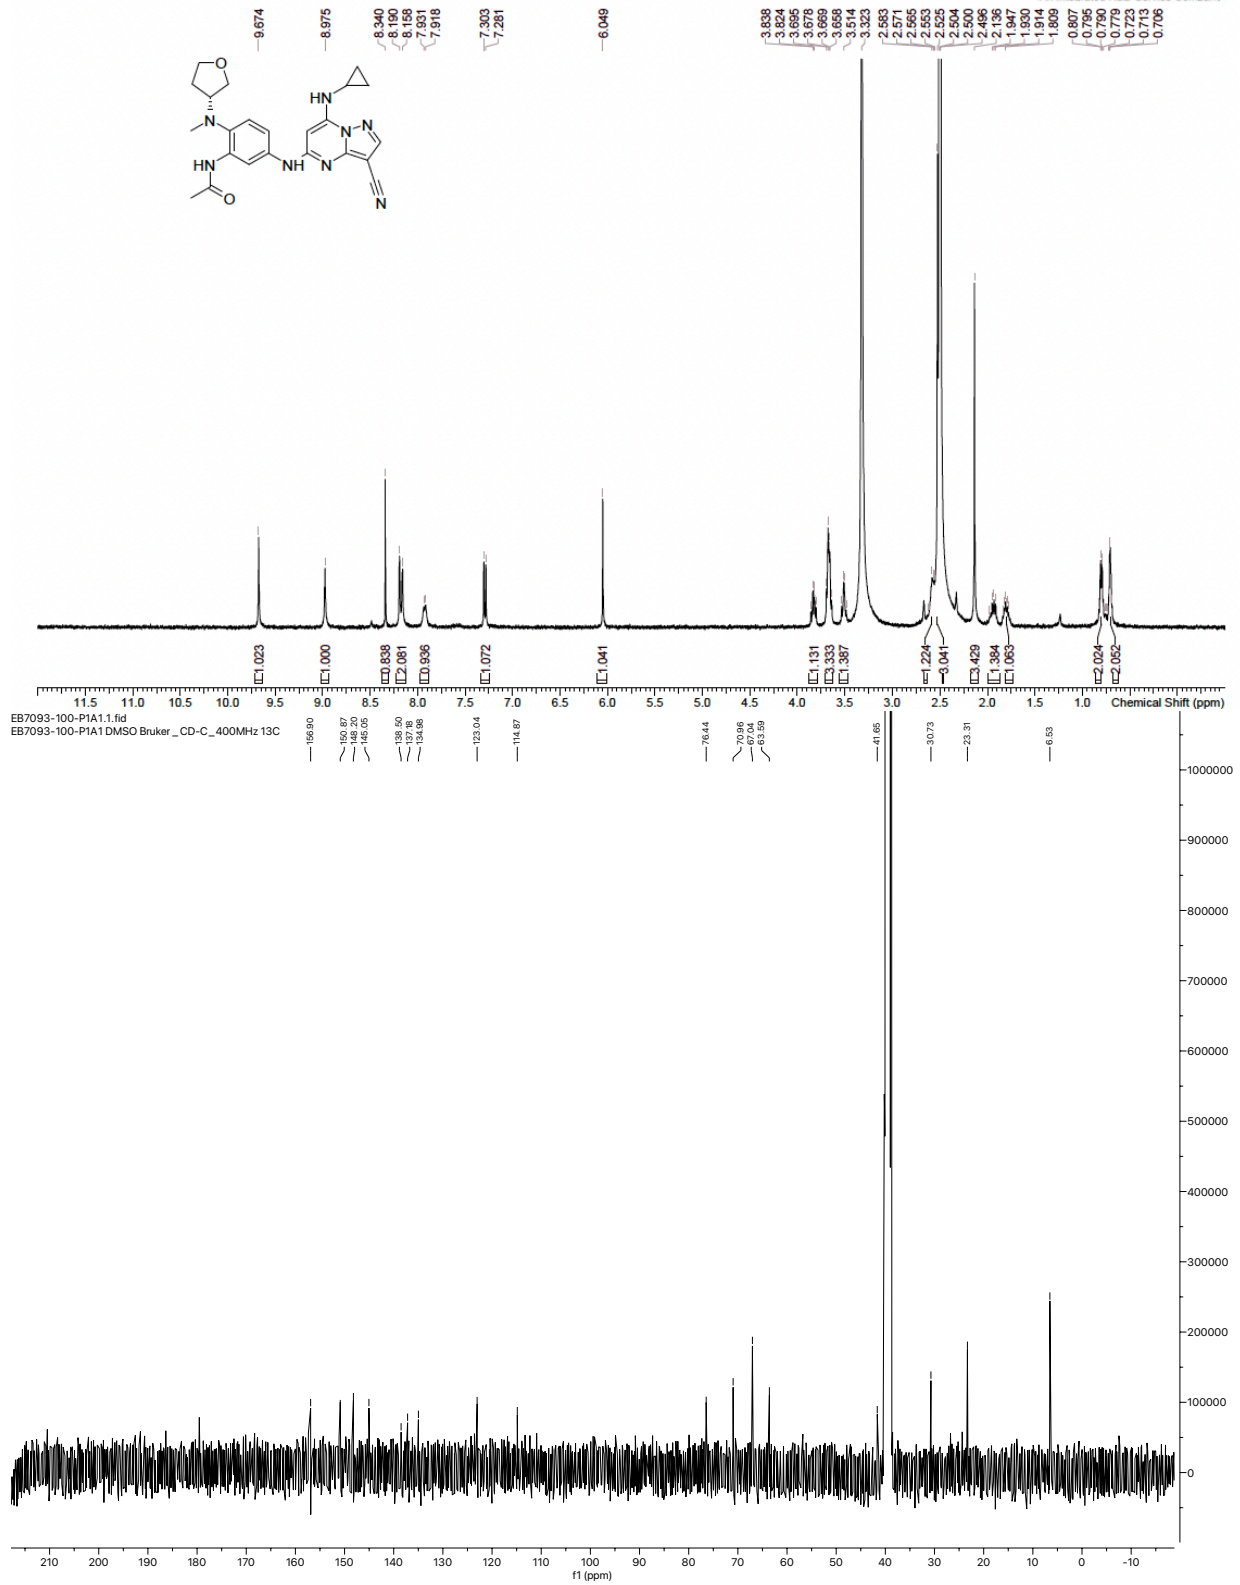

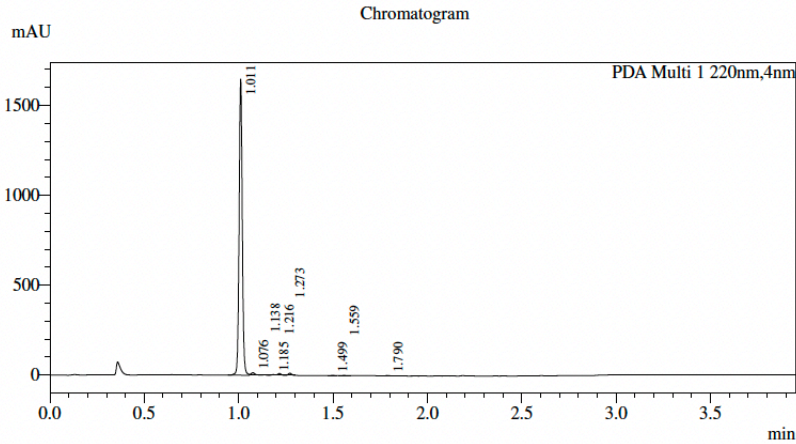

=====  
**Integration Result**  
 =====

| PDA Ch1 220nm |           |           |         |         |         |         |
|---------------|-----------|-----------|---------|---------|---------|---------|
| Peak#         | Ret. Time | USP Width | Height  | Height% | Area    | Area%   |
| 1             | 1.011     | 0.030     | 1647850 | 97.064  | 1930550 | 96.685  |
| 2             | 1.076     | 0.040     | 13718   | 0.808   | 21639   | 1.084   |
| 3             | 1.138     | 0.035     | 2810    | 0.166   | 3740    | 0.187   |
| 4             | 1.185     | 0.036     | 4091    | 0.241   | 5236    | 0.262   |
| 5             | 1.216     | 0.034     | 10313   | 0.607   | 13133   | 0.658   |
| 6             | 1.273     | 0.033     | 11686   | 0.688   | 14086   | 0.705   |
| 7             | 1.499     | 0.032     | 2509    | 0.148   | 3055    | 0.153   |
| 8             | 1.559     | 0.032     | 2420    | 0.143   | 3133    | 0.157   |
| 9             | 1.790     | 0.025     | 2291    | 0.135   | 2180    | 0.109   |
| Total         |           |           | 1697688 | 100.000 | 1996752 | 100.000 |

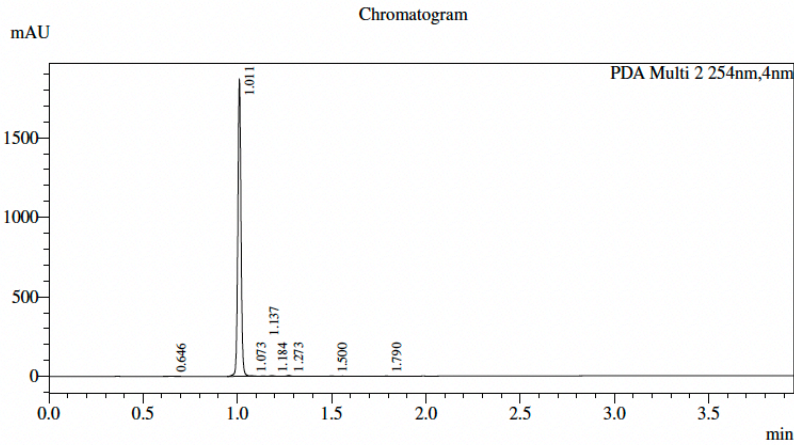

=====  
**Integration Result**  
 =====

| PDA Ch2 254nm |           |           |         |         |         |         |
|---------------|-----------|-----------|---------|---------|---------|---------|
| Peak#         | Ret. Time | USP Width | Height  | Height% | Area    | Area%   |
| 1             | 0.646     | 0.040     | 1654    | 0.088   | 2754    | 0.125   |
| 2             | 1.011     | 0.030     | 1863169 | 98.883  | 2179383 | 98.756  |
| 3             | 1.073     | 0.061     | 4213    | 0.224   | 6923    | 0.314   |
| 4             | 1.137     | 0.030     | 2226    | 0.118   | 2587    | 0.117   |
| 5             | 1.184     | 0.032     | 4371    | 0.232   | 5208    | 0.236   |
| 6             | 1.273     | 0.033     | 5366    | 0.285   | 6454    | 0.292   |
| 7             | 1.500     | 0.031     | 2156    | 0.114   | 2586    | 0.117   |
| 8             | 1.790     | 0.024     | 1053    | 0.056   | 943     | 0.043   |
| Total         |           |           | 1884208 | 100.000 | 2206839 | 100.000 |

# NMR and HPLC spectra of 2m:

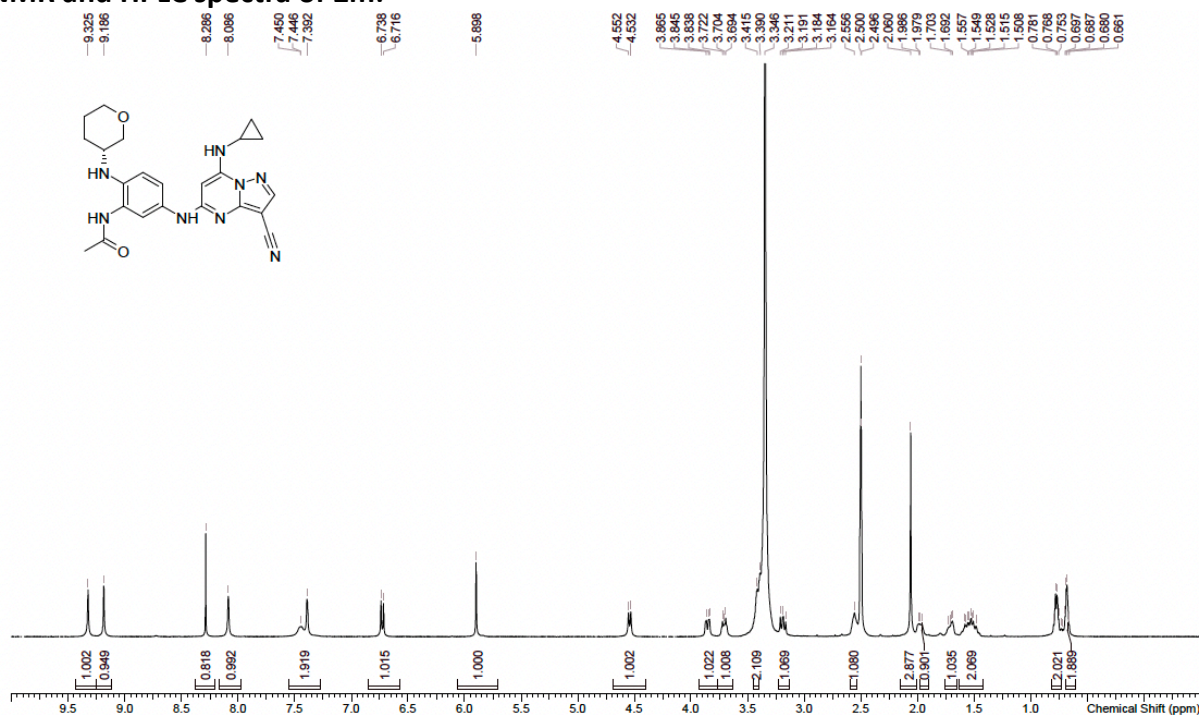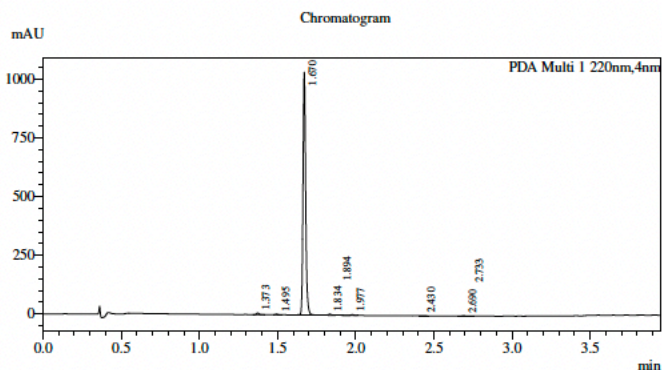

Integration Result

| Peak# | Ret. Time | USPWidth | Height  | Height% | Area    | Area%   |
|-------|-----------|----------|---------|---------|---------|---------|
| 1     | 1.373     | 0.028    | 7323    | 0.693   | 8110    | 0.653   |
| 2     | 1.495     | 0.031    | 2975    | 0.281   | 3892    | 0.314   |
| 3     | 1.670     | 0.030    | 1034702 | 97.890  | 1211514 | 97.599  |
| 4     | 1.834     | 0.032    | 4392    | 0.416   | 5782    | 0.466   |
| 5     | 1.894     | 0.041    | 1102    | 0.104   | 1807    | 0.146   |
| 6     | 1.977     | 0.034    | 2849    | 0.270   | 4428    | 0.357   |
| 7     | 2.430     | 0.042    | 1239    | 0.117   | 1969    | 0.159   |
| 8     | 2.690     | 0.037    | 1362    | 0.129   | 2147    | 0.173   |
| 9     | 2.733     | 0.041    | 1055    | 0.100   | 1674    | 0.135   |
| Total |           |          | 1057000 | 100.000 | 1241322 | 100.000 |

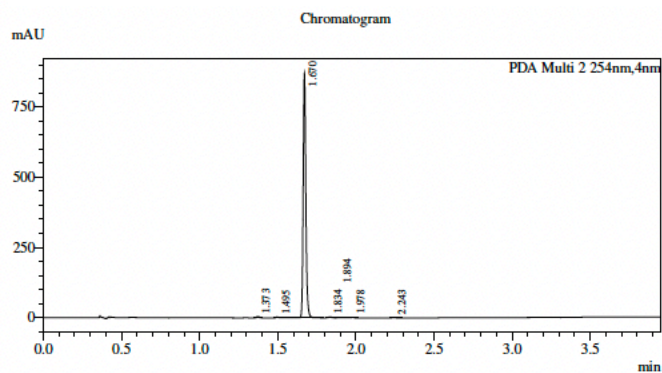

Integration Result

| Peak# | Ret. Time | USPWidth | Height | Height% | Area    | Area%   |
|-------|-----------|----------|--------|---------|---------|---------|
| 1     | 1.373     | 0.028    | 4165   | 0.470   | 4449    | 0.427   |
| 2     | 1.495     | 0.031    | 2984   | 0.337   | 5124    | 0.492   |
| 3     | 1.670     | 0.030    | 871955 | 98.352  | 1021765 | 98.038  |
| 4     | 1.834     | 0.031    | 3351   | 0.378   | 4028    | 0.386   |
| 5     | 1.894     | 0.042    | 1278   | 0.144   | 2881    | 0.276   |
| 6     | 1.978     | 0.035    | 1812   | 0.204   | 2479    | 0.238   |
| 7     | 2.243     | 0.037    | 1024   | 0.116   | 1488    | 0.143   |
| Total |           |          | 886569 | 100.000 | 1042213 | 100.000 |

# NMR and HPLC spectra of 2n:

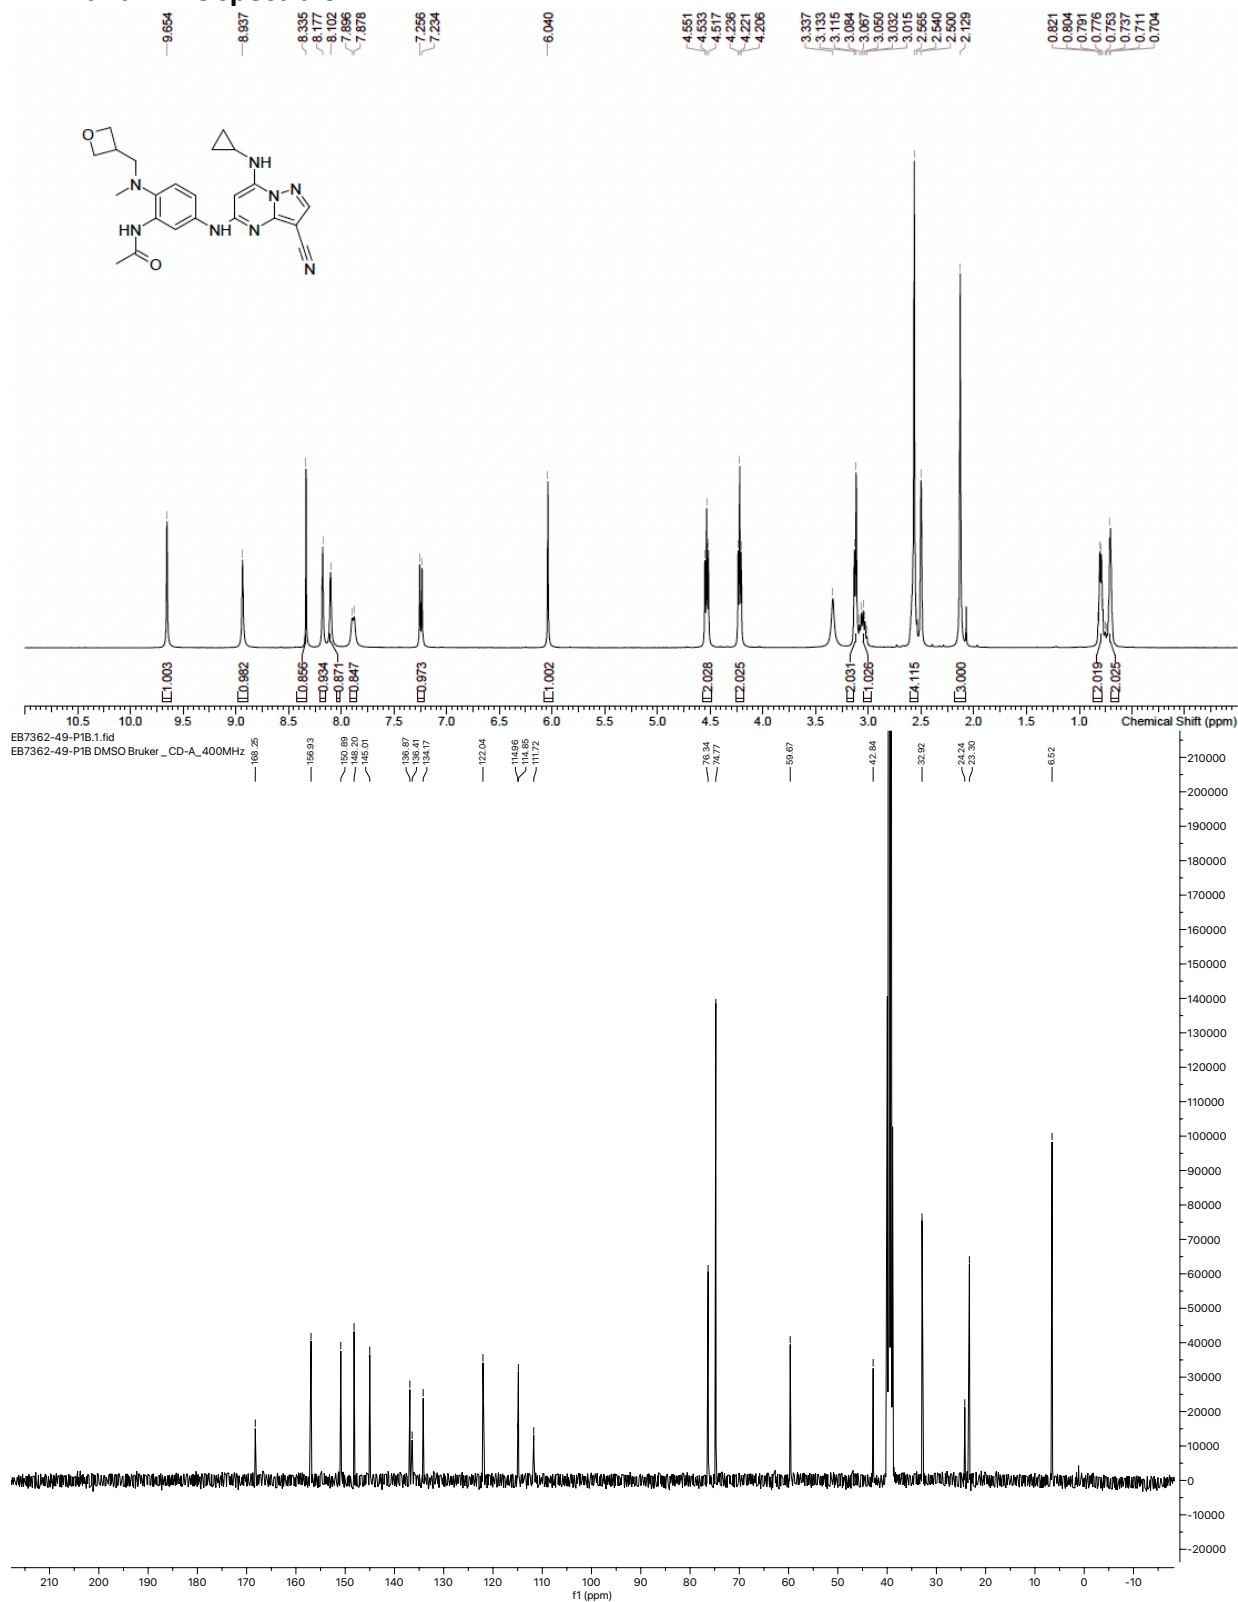

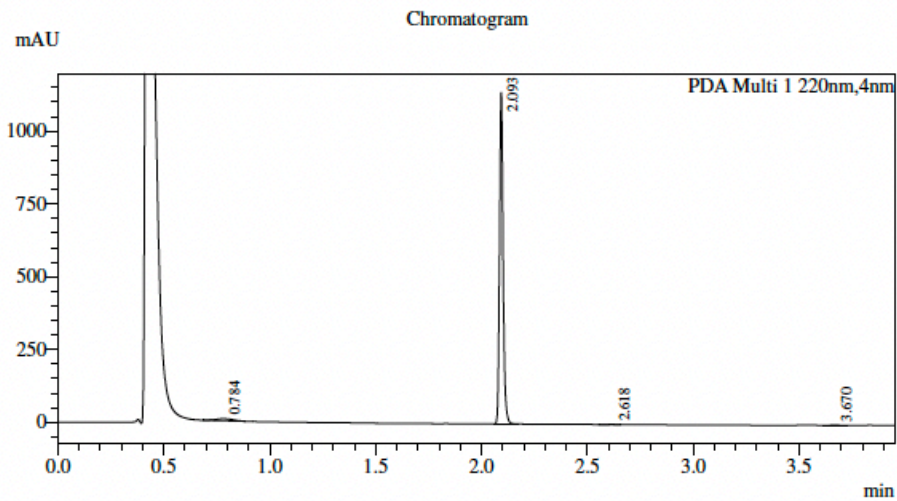

=====  
**Integration Result**  
 =====

PDA Ch1 220nm

| Peak# | Ret. Time | USP Width | Height  | Height% | Area    | Area%   |
|-------|-----------|-----------|---------|---------|---------|---------|
| 1     | 0.784     | 0.136     | 7387    | 0.643   | 40781   | 2.928   |
| 2     | 2.093     | 0.030     | 1139441 | 99.175  | 1346604 | 96.681  |
| 3     | 2.618     | 0.051     | 1021    | 0.089   | 2485    | 0.178   |
| 4     | 3.670     | 0.059     | 1071    | 0.093   | 2960    | 0.213   |
| Total |           |           | 1148920 | 100.000 | 1392830 | 100.000 |

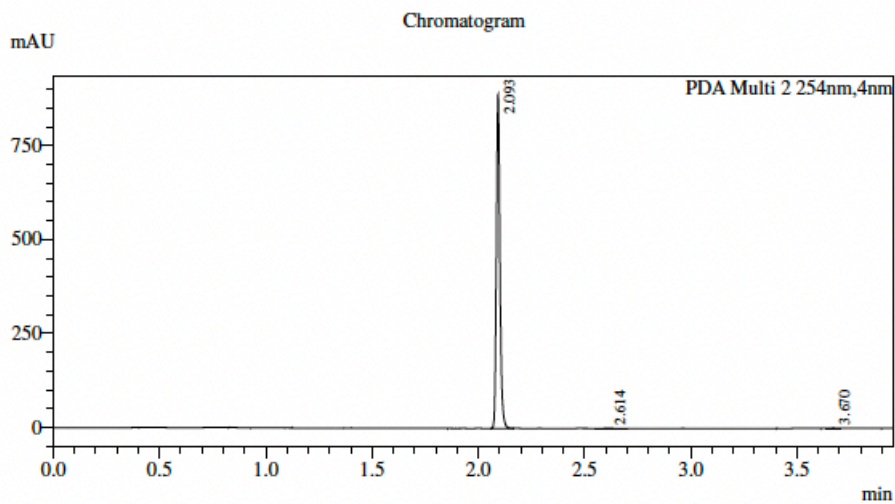

=====  
**Integration Result**  
 =====

PDA Ch2 254nm

| Peak# | Ret. Time | USP Width | Height | Height% | Area    | Area%   |
|-------|-----------|-----------|--------|---------|---------|---------|
| 1     | 2.093     | 0.030     | 887654 | 99.743  | 1051968 | 99.517  |
| 2     | 2.614     | 0.051     | 1138   | 0.128   | 3058    | 0.289   |
| 3     | 3.670     | 0.044     | 1148   | 0.129   | 2043    | 0.193   |
| Total |           |           | 889941 | 100.000 | 1057069 | 100.000 |
